# Supplementary material
Source: PubMed Central journal article supplement (PMC4899231)

## Supporting Information

### Automated glycan sequencing from tandem mass spectra of N-linked glycopeptides

Chuan-Yih Yu<sup>1</sup>, Anoop Mayampurath<sup>2</sup>, Rui Zhu<sup>3</sup>, Lauren Zacharias<sup>3</sup>, Ehwang Song<sup>3</sup>,  
Lei Wang<sup>1</sup>, Yehia Mechref<sup>3</sup>, Haixu Tang<sup>1\*</sup>

<sup>1</sup>School of Informatics and Computing, Indiana University, Bloomington, IN, USA

<sup>2</sup>Computation Institute, University of Chicago, Chicago, IL, USA,

<sup>3</sup>Department of Chemistry and Biochemistry, Texas Tech University, Lubbock, TX, USA

\*Corresponding author: Haixu Tang (Email: [hatang@indiana.edu](mailto:hatang@indiana.edu))

131\_HILIC\_091614\_01 #360 RT: 15.30 AV: 1 NL: 2.41E5  
T: ITMS + c NSI d Full ms2 846.37@cid35.00 [220.00-2000.00]

Parent  $m/z$  846.3726

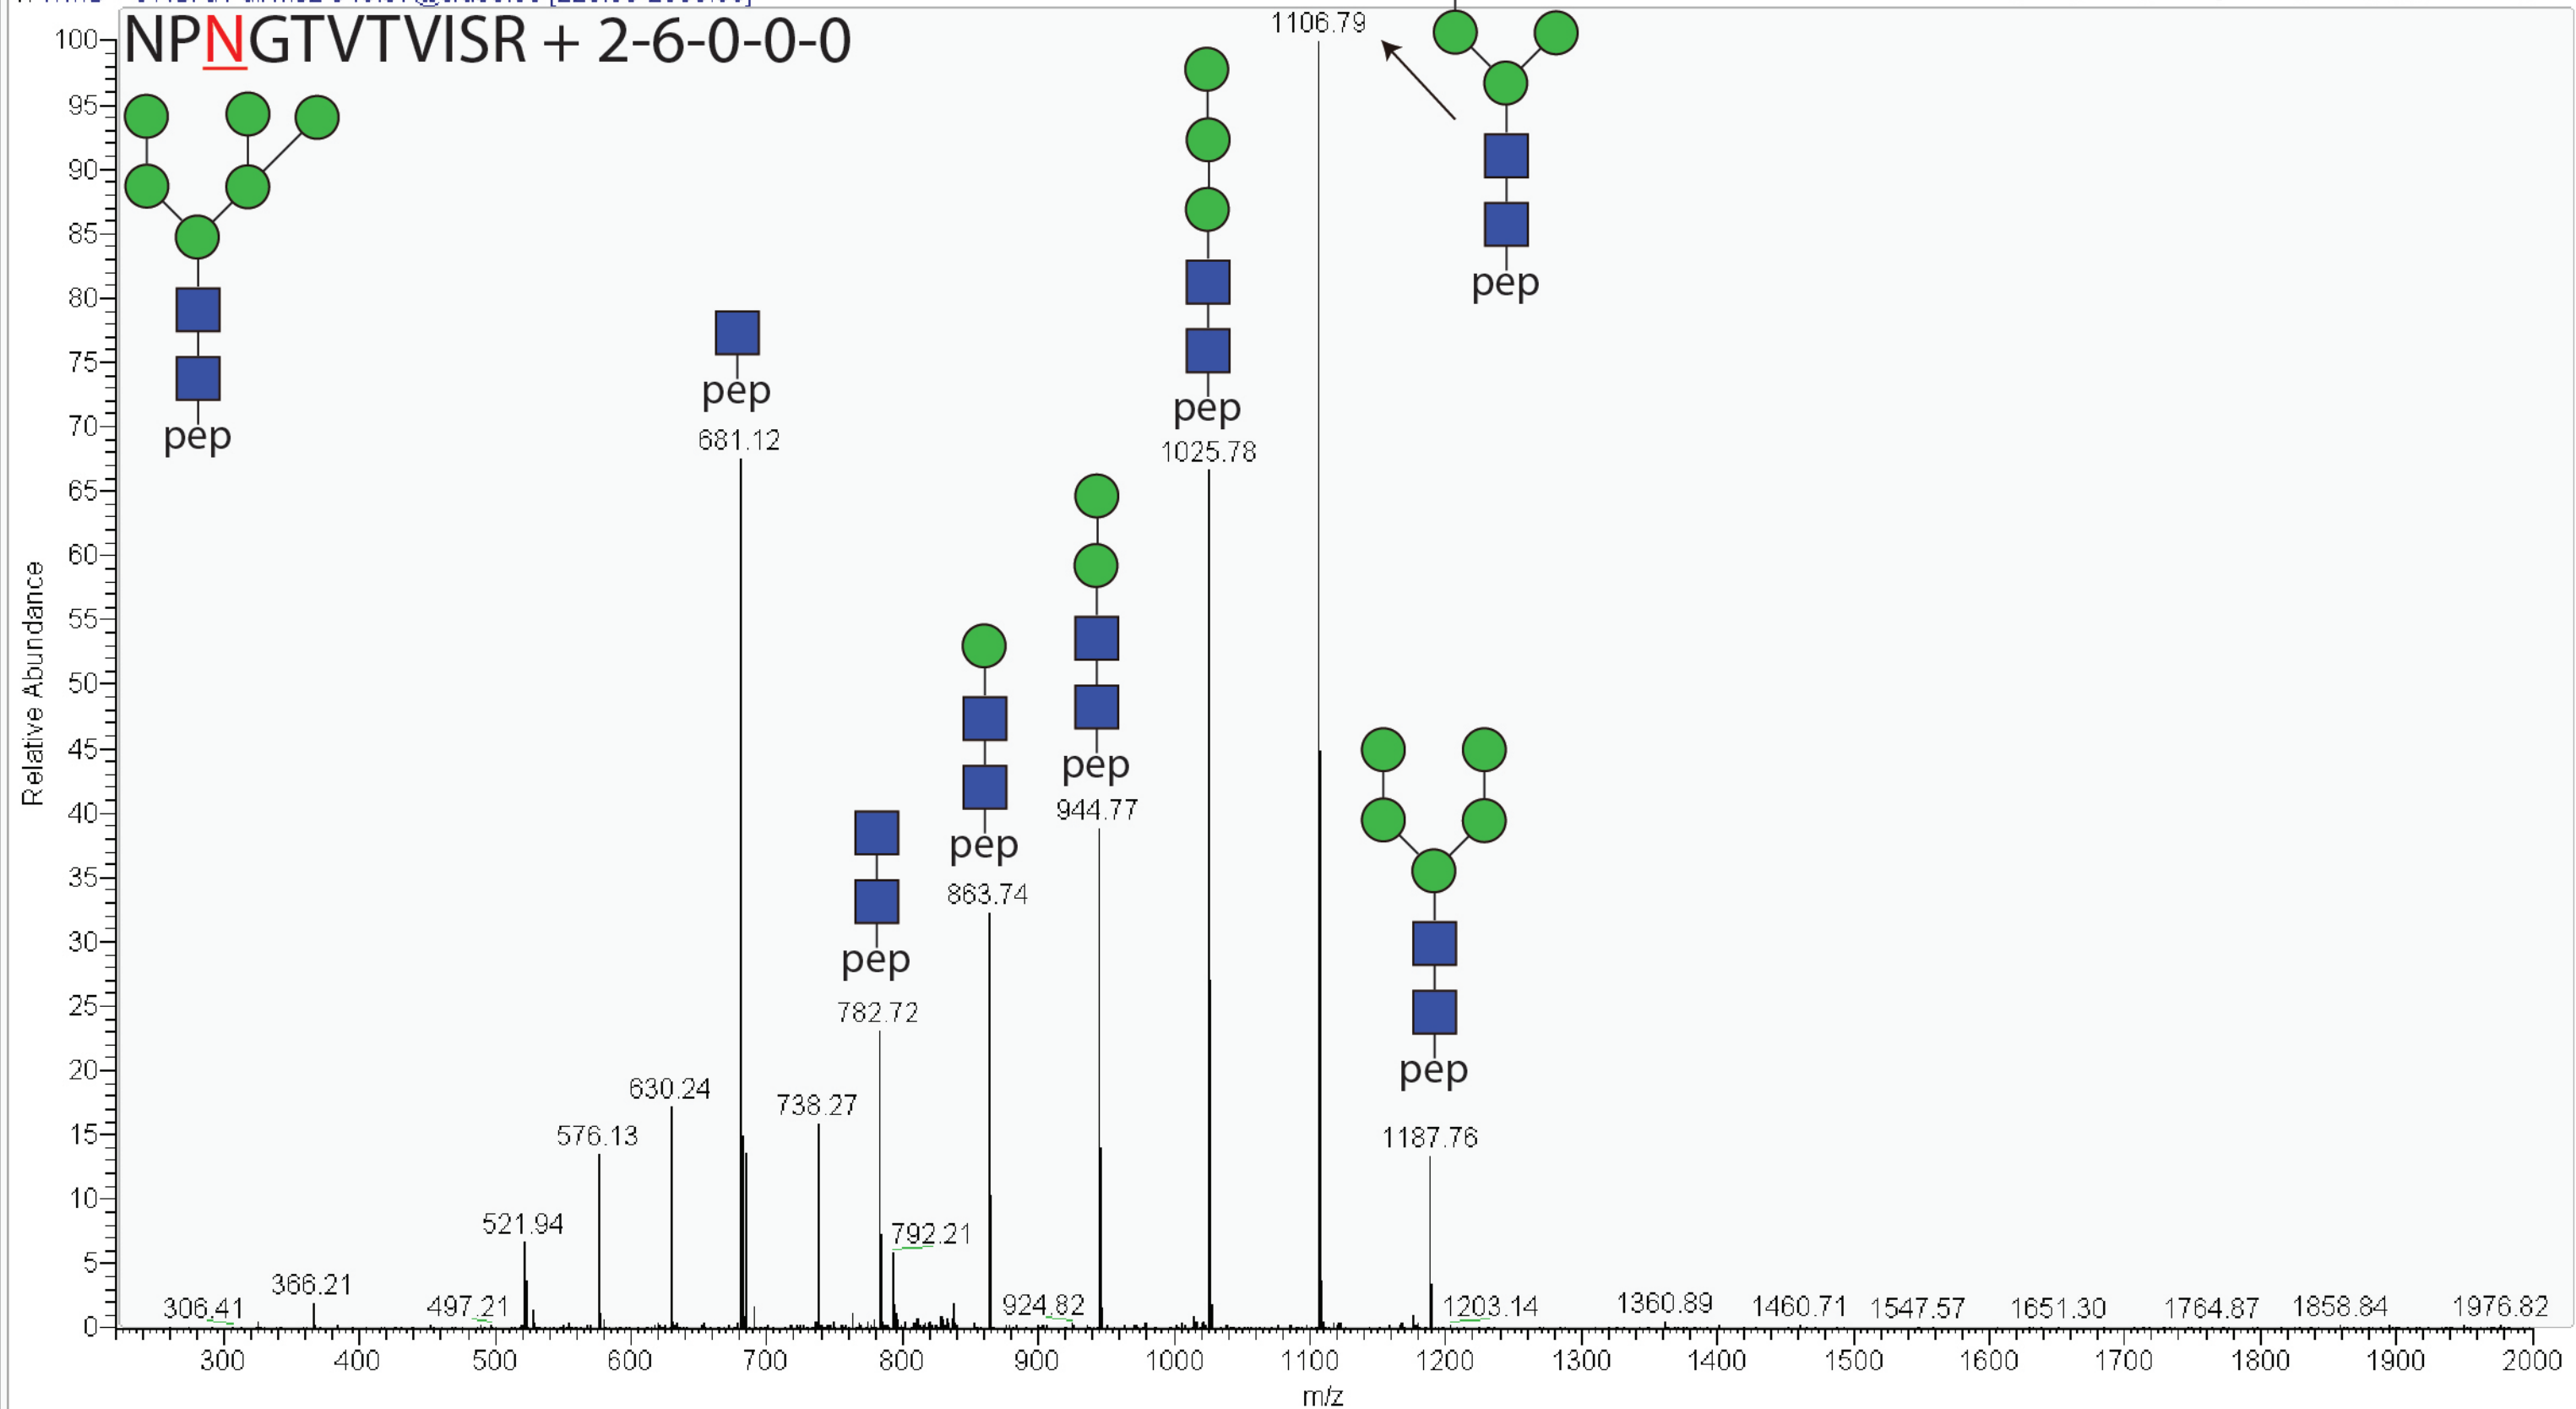

131\_HILIC\_091614\_01#516 RT: 16.24 AV: 1 NL: 3.63E3  
T: ITMS + c NSI d Full ms2 1278.86@cid35.00 [340.00-2000.00]

Parent  $m/z$  1278.857

**Y**NCTATNHIGTR + 5-6-3-0-0

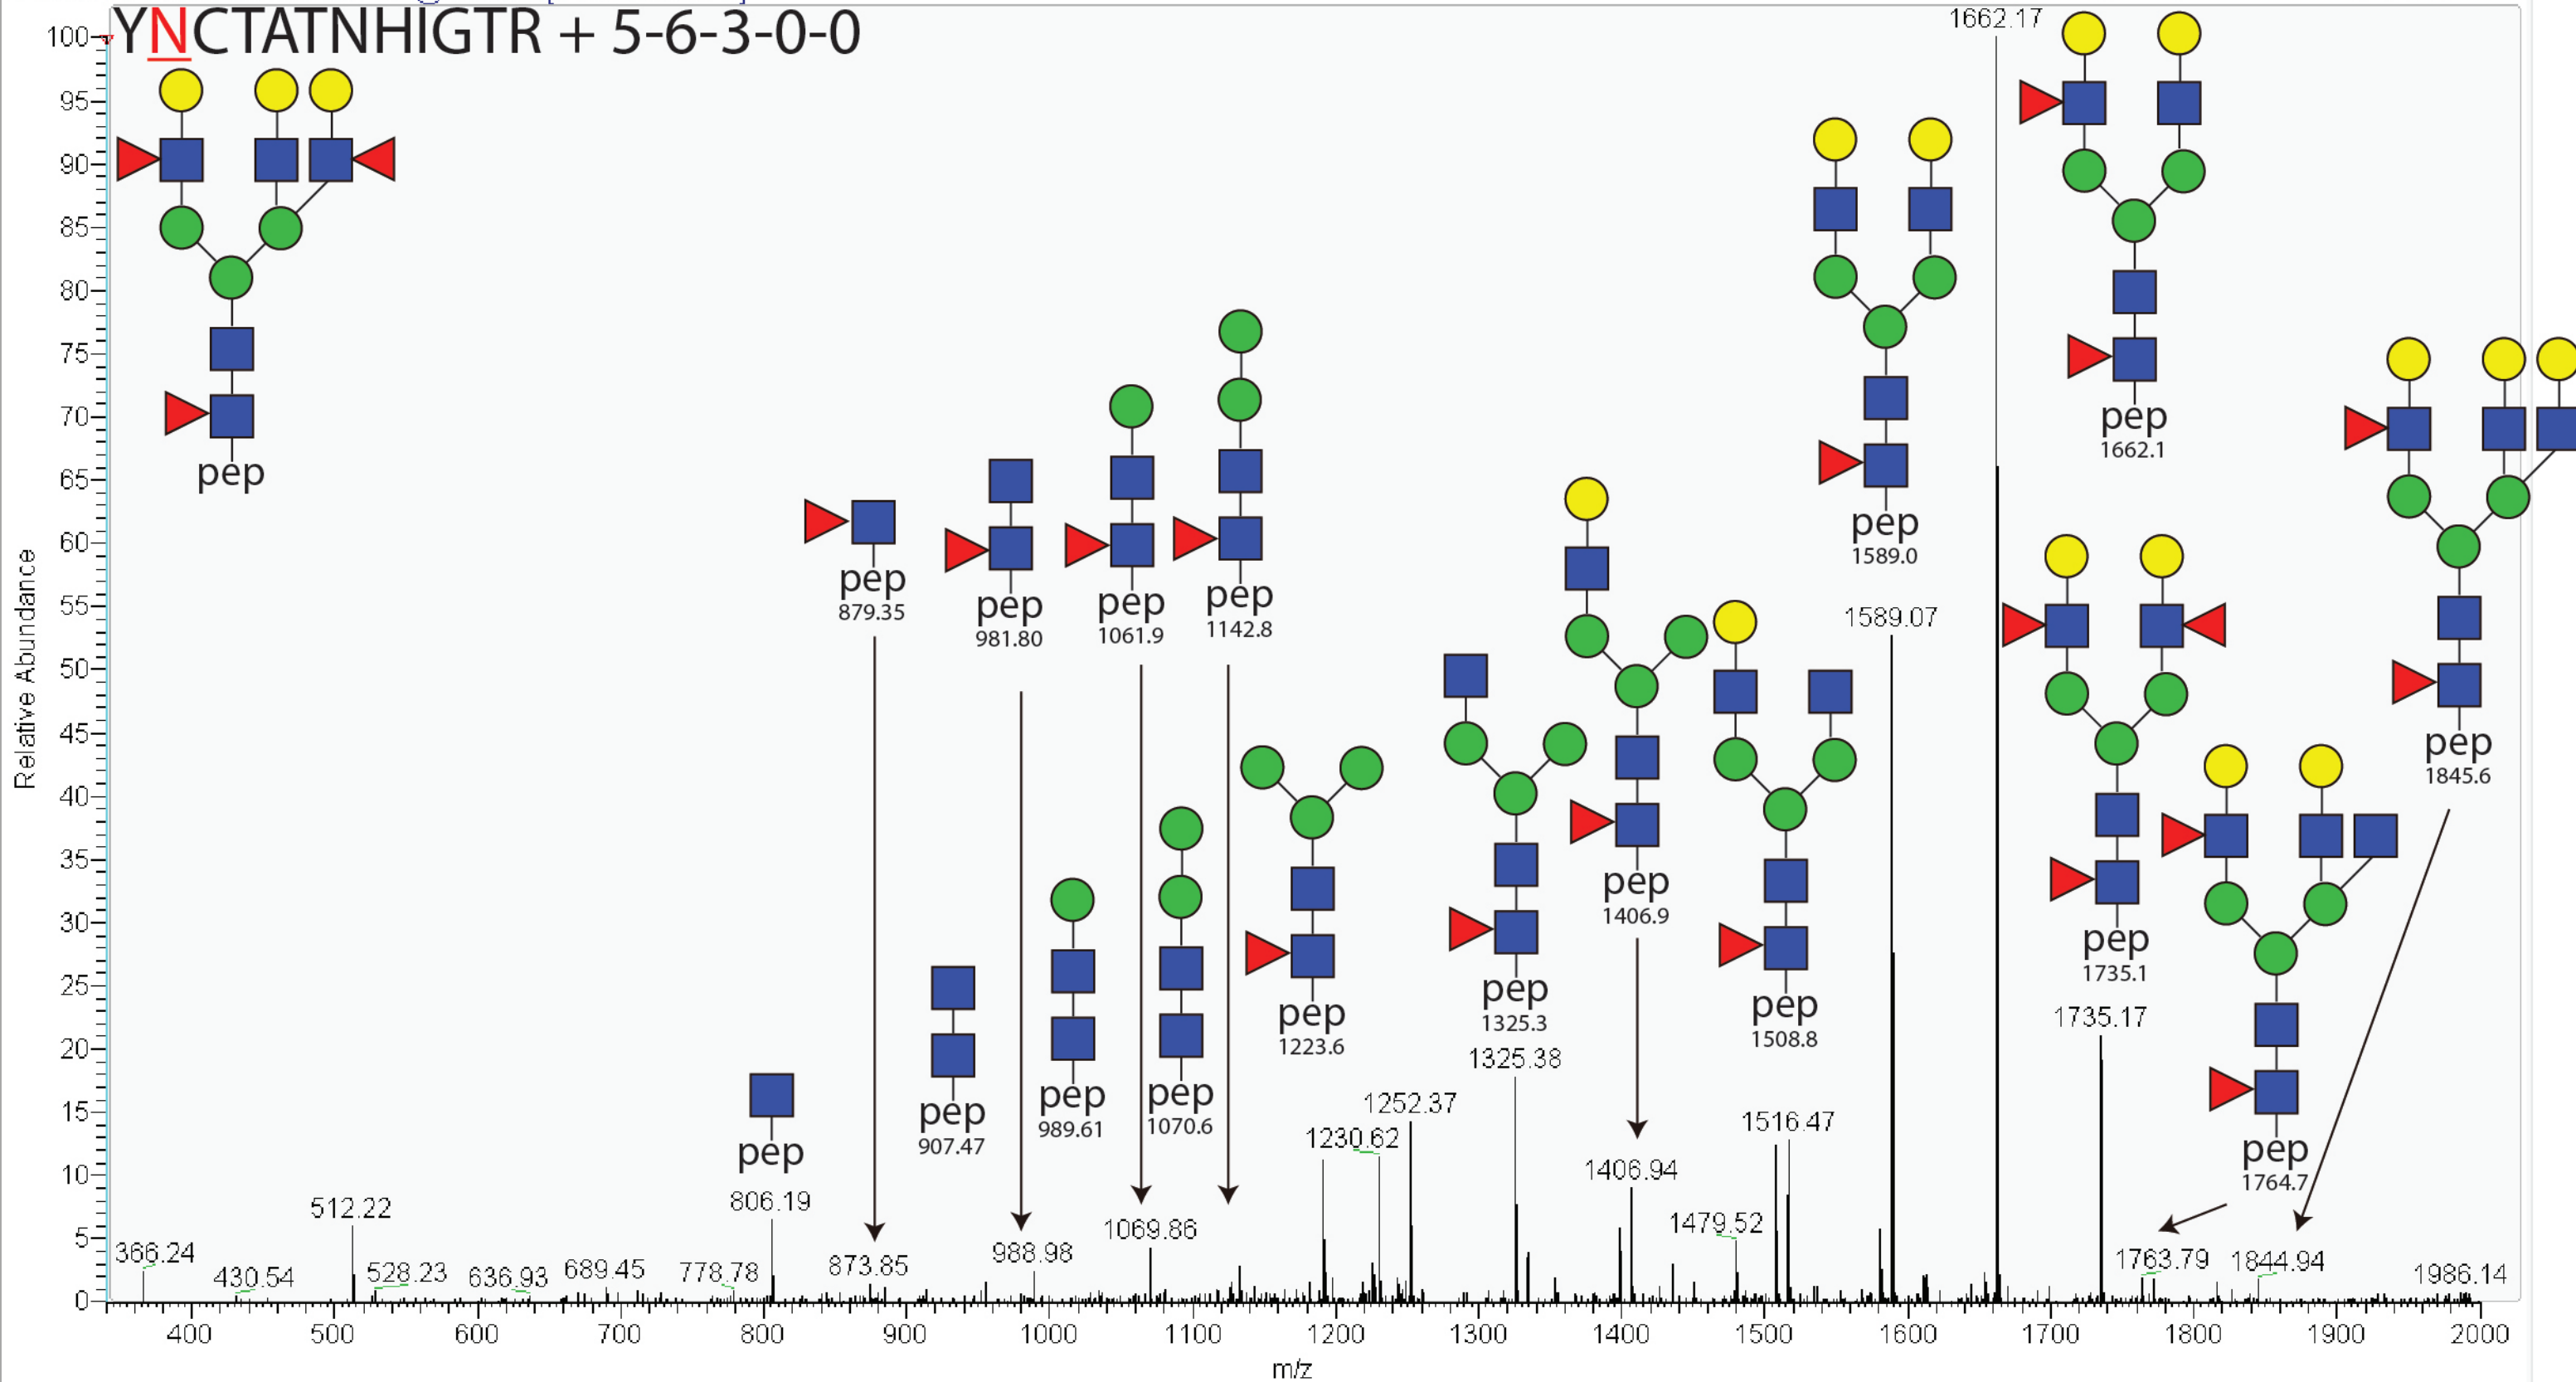

131\_HILIC\_091614\_01 #624 RT: 16.90 AV: 1 NL: 2.32E4  
T: ITMS + c NSI d Full ms2 1046.13@cid35.00 [275.00-2000.00]

Parent  $m/z$  1046.126

VVNSTTGPGEHLR + 4-5-1-0-0

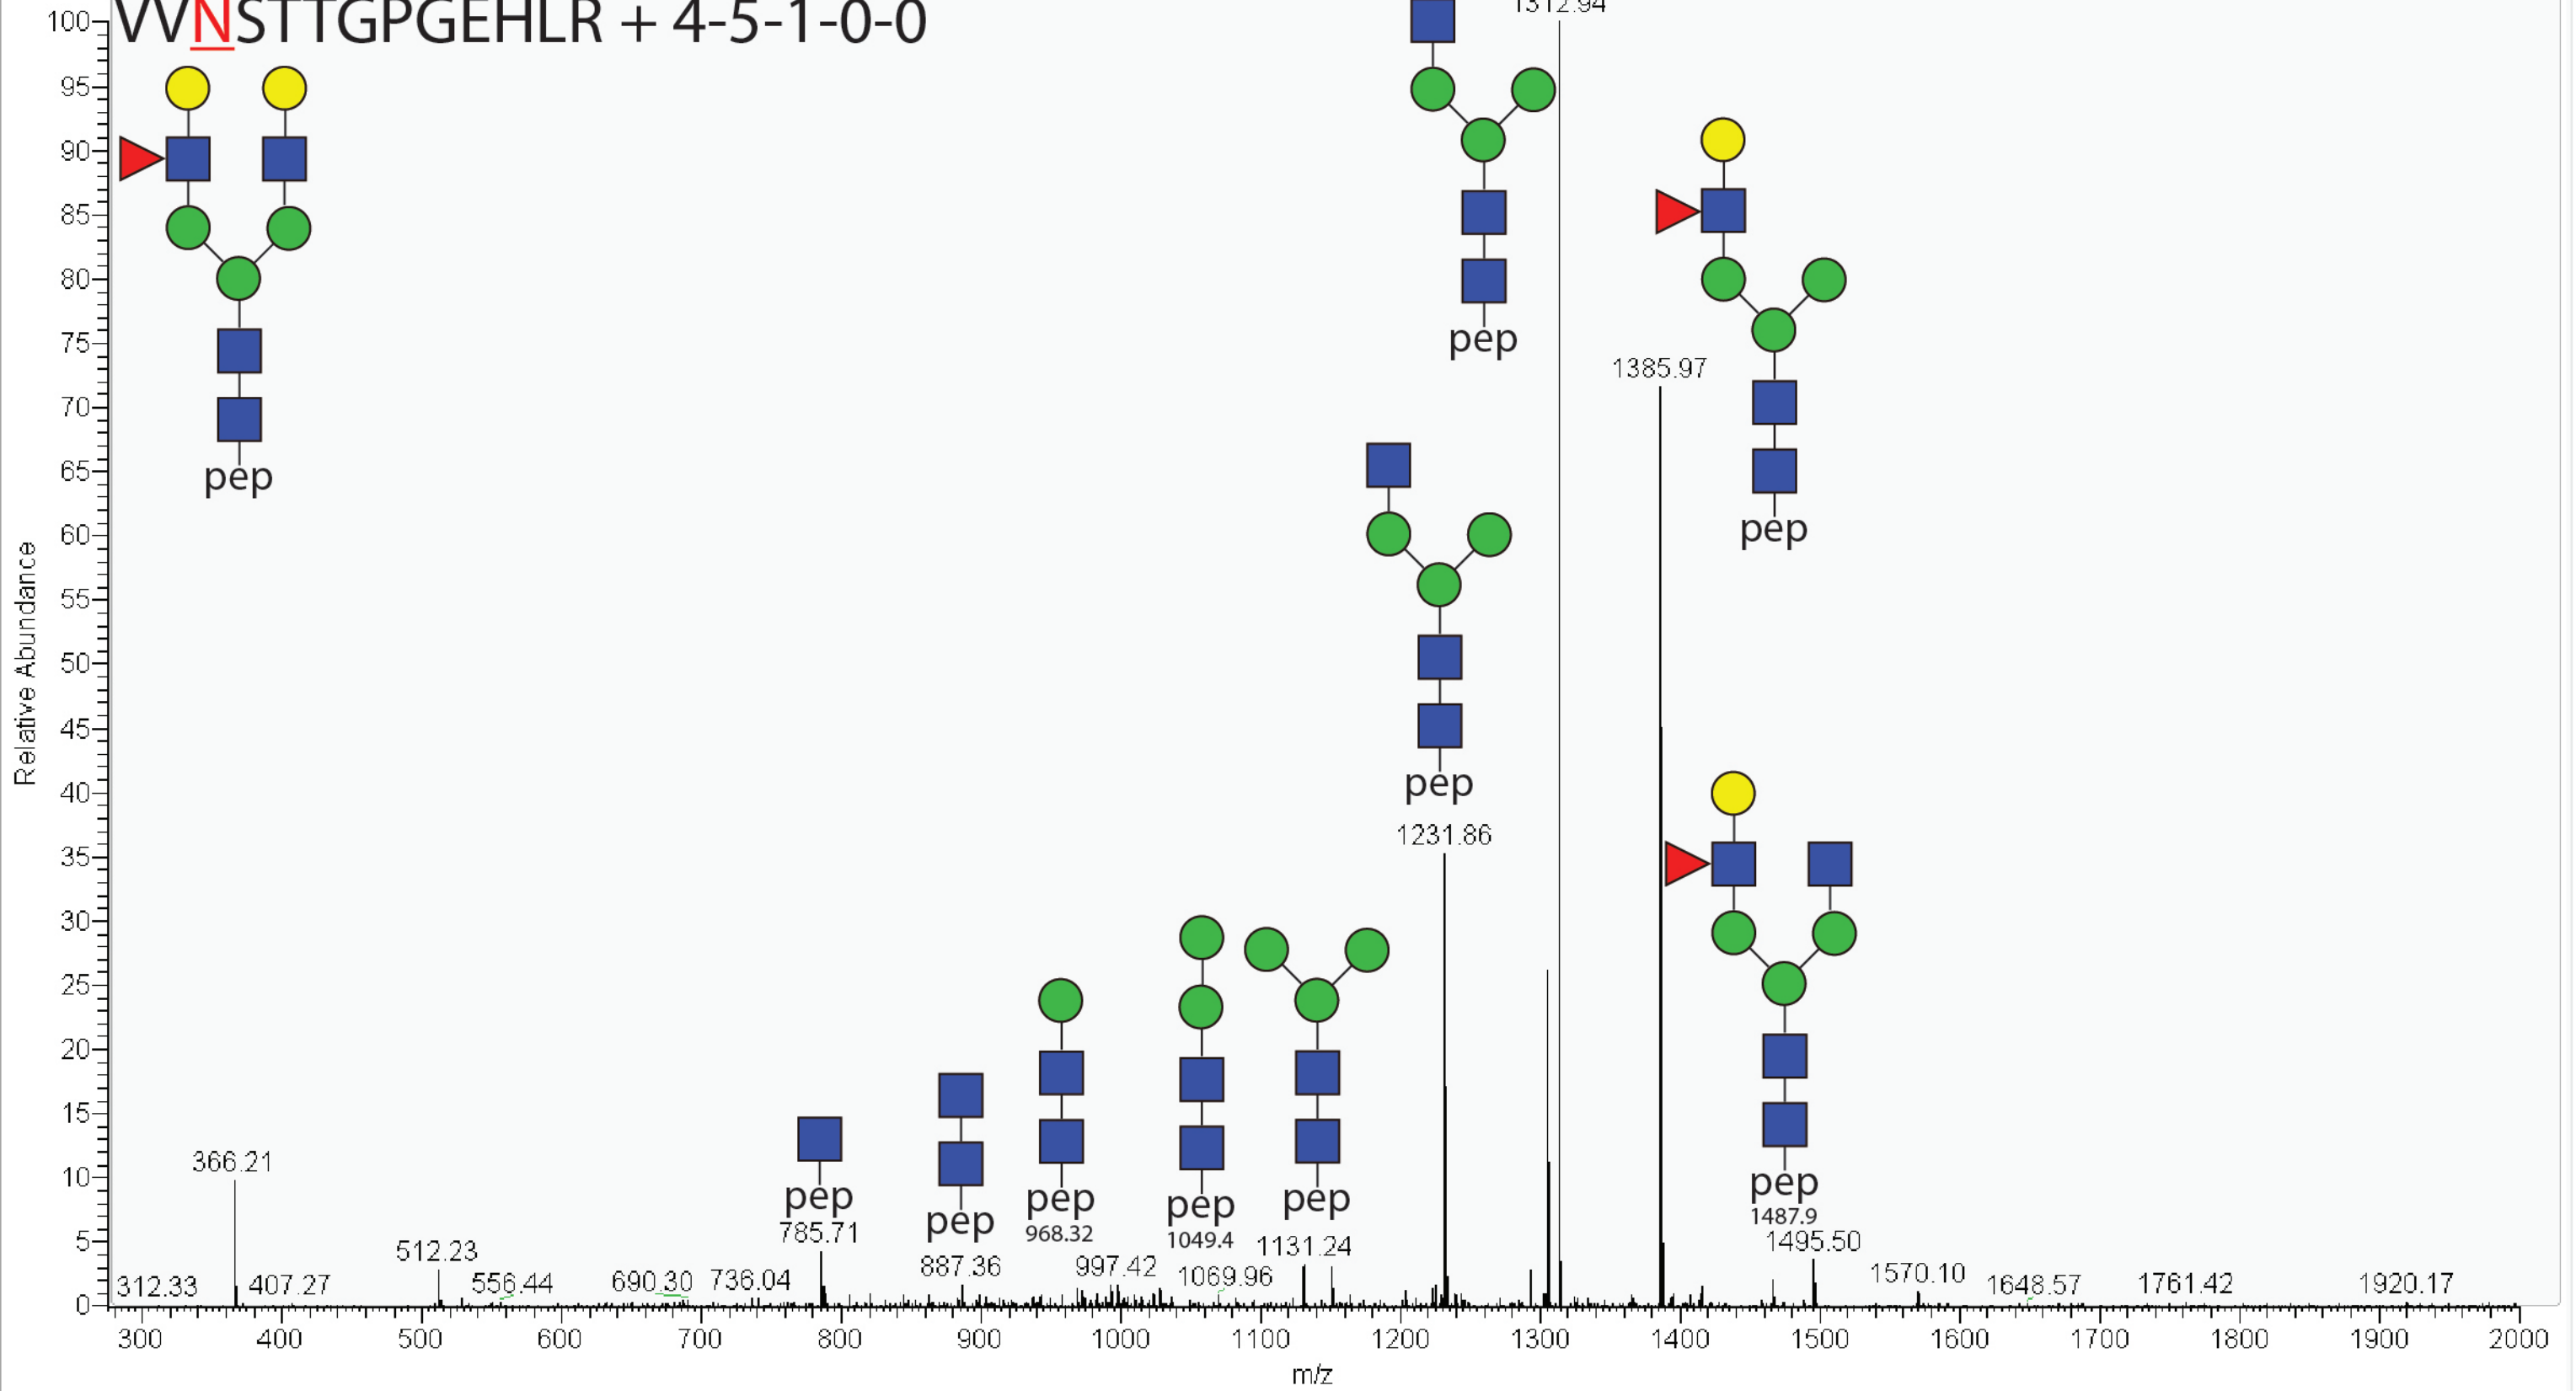

VQPFNVTQGK + 2-7-0-0-0

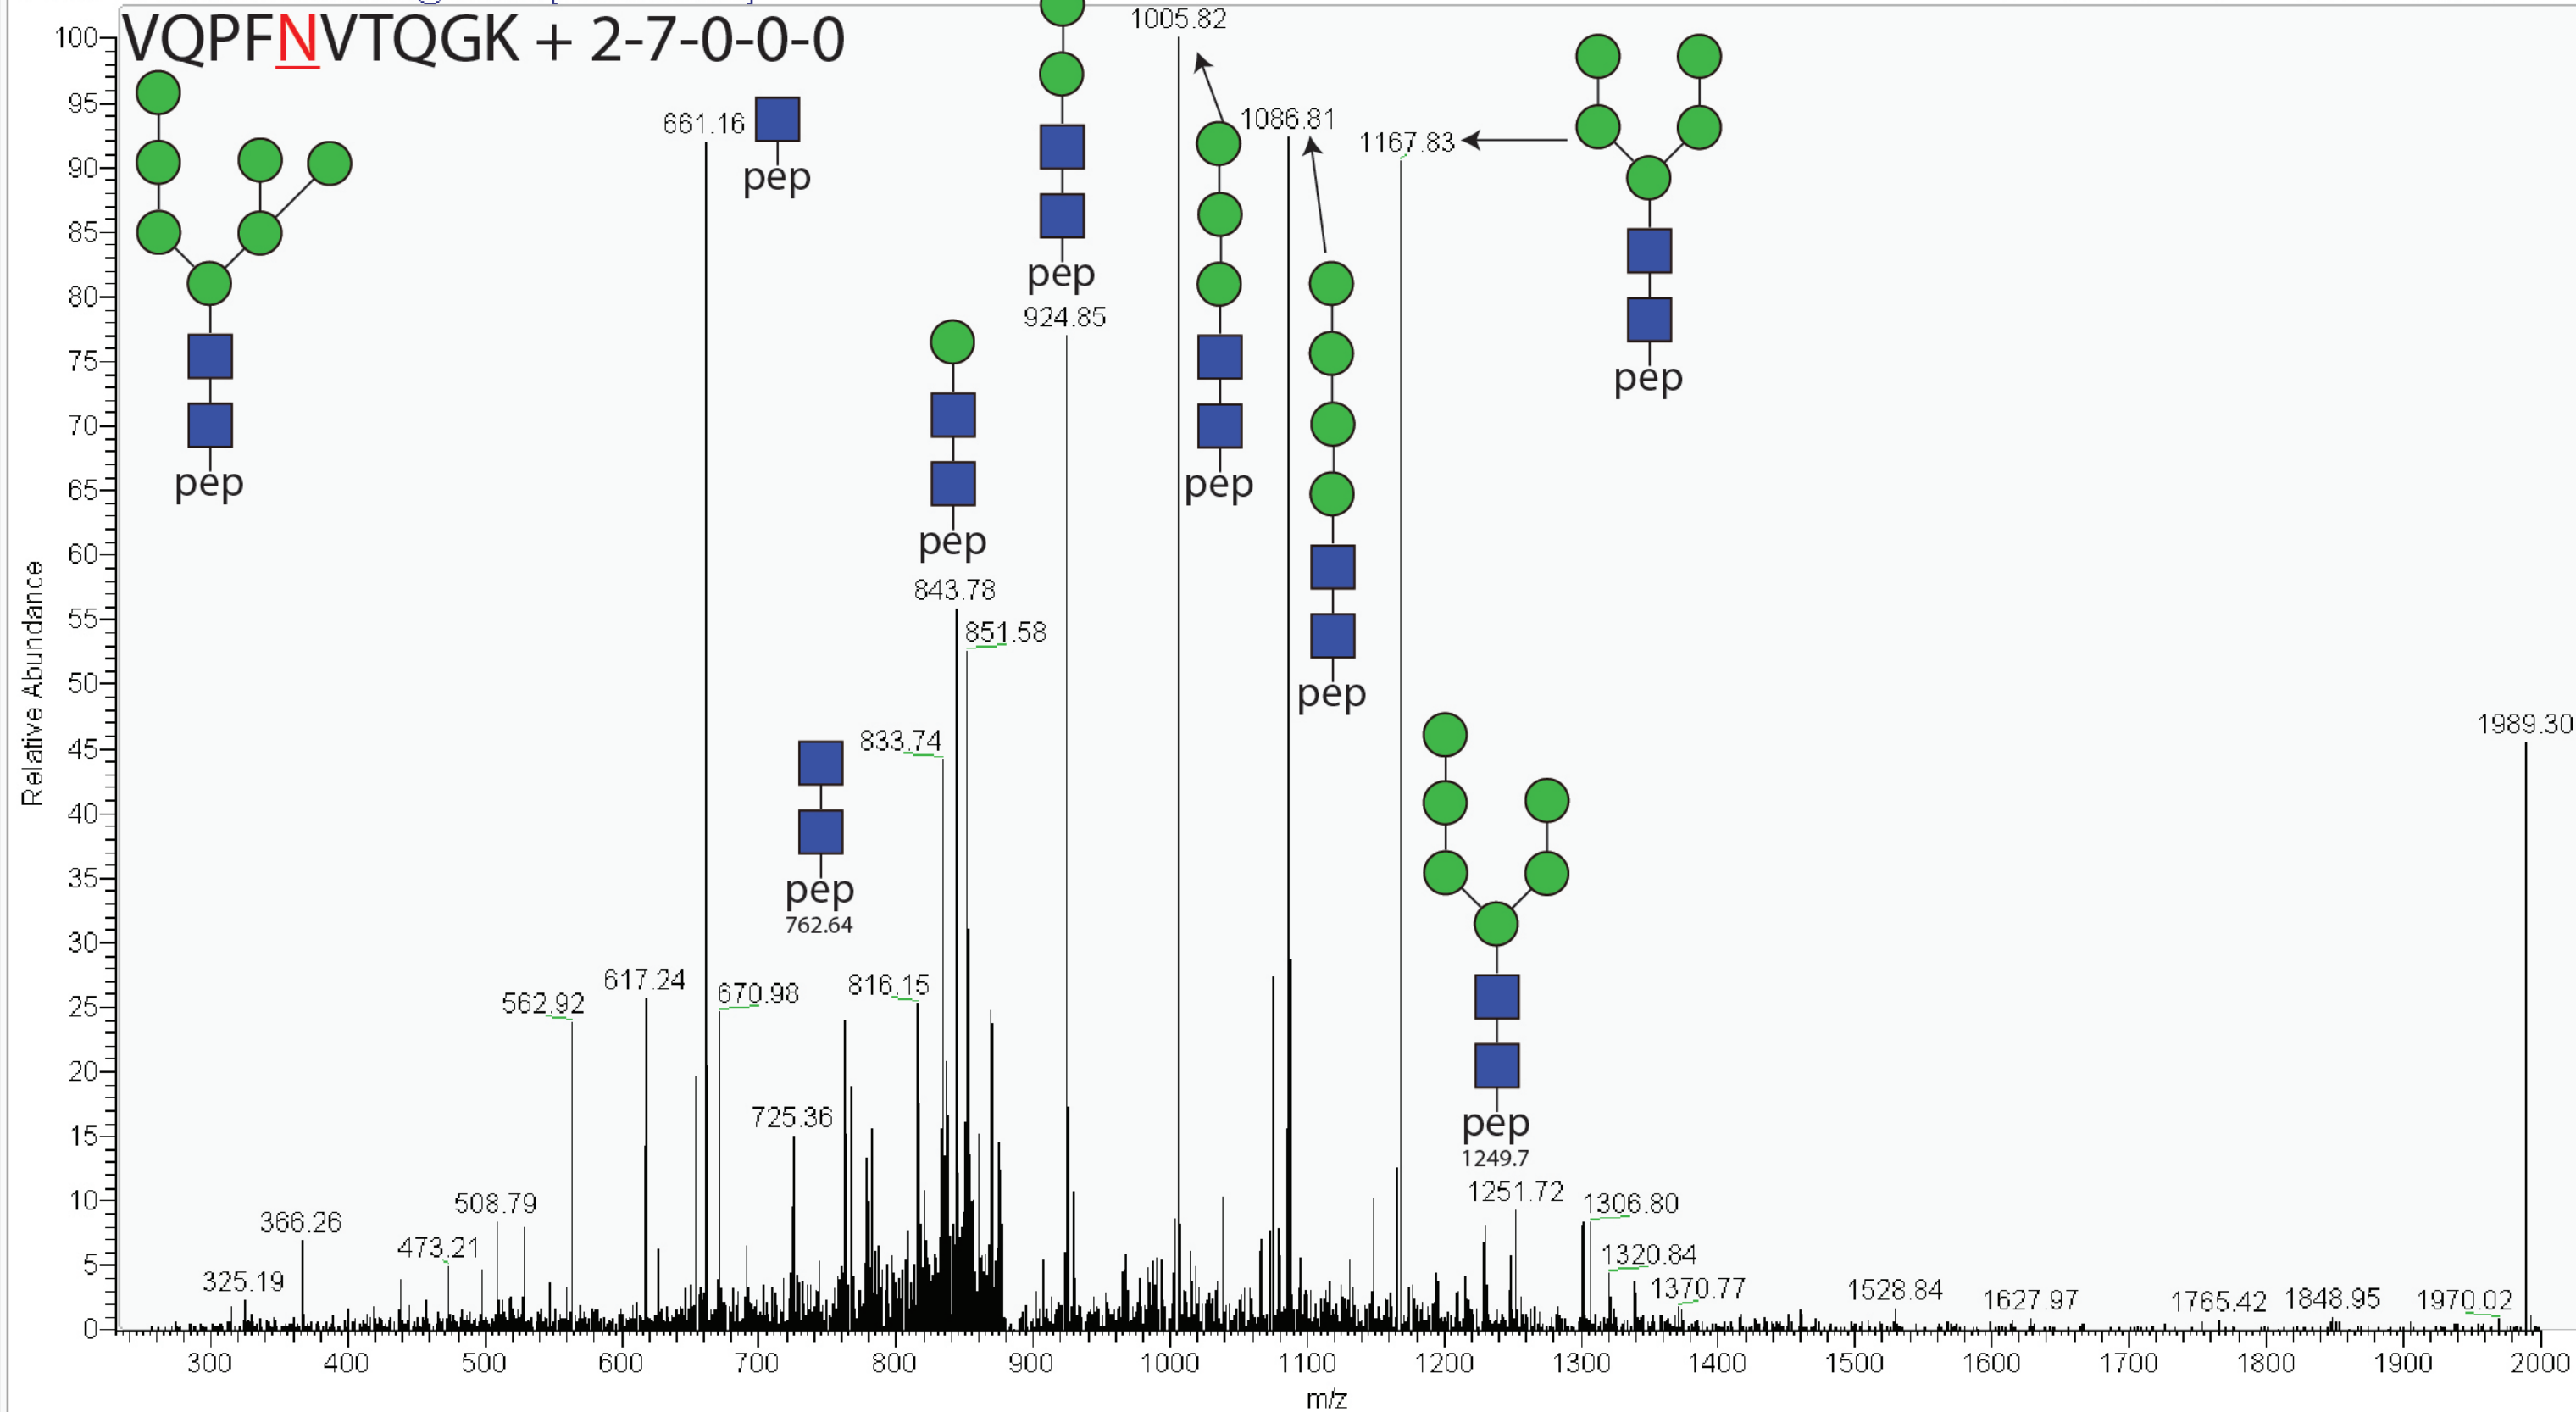

131\_HILIC\_091614\_01#5279 RT: 47.11 AV: 1 NL: 4.45E3  
T: ITMS + c NSI d Full ms2 1435.14@cid35.00 [385.00-2000.00]

Parent  $m/z$  1435.139

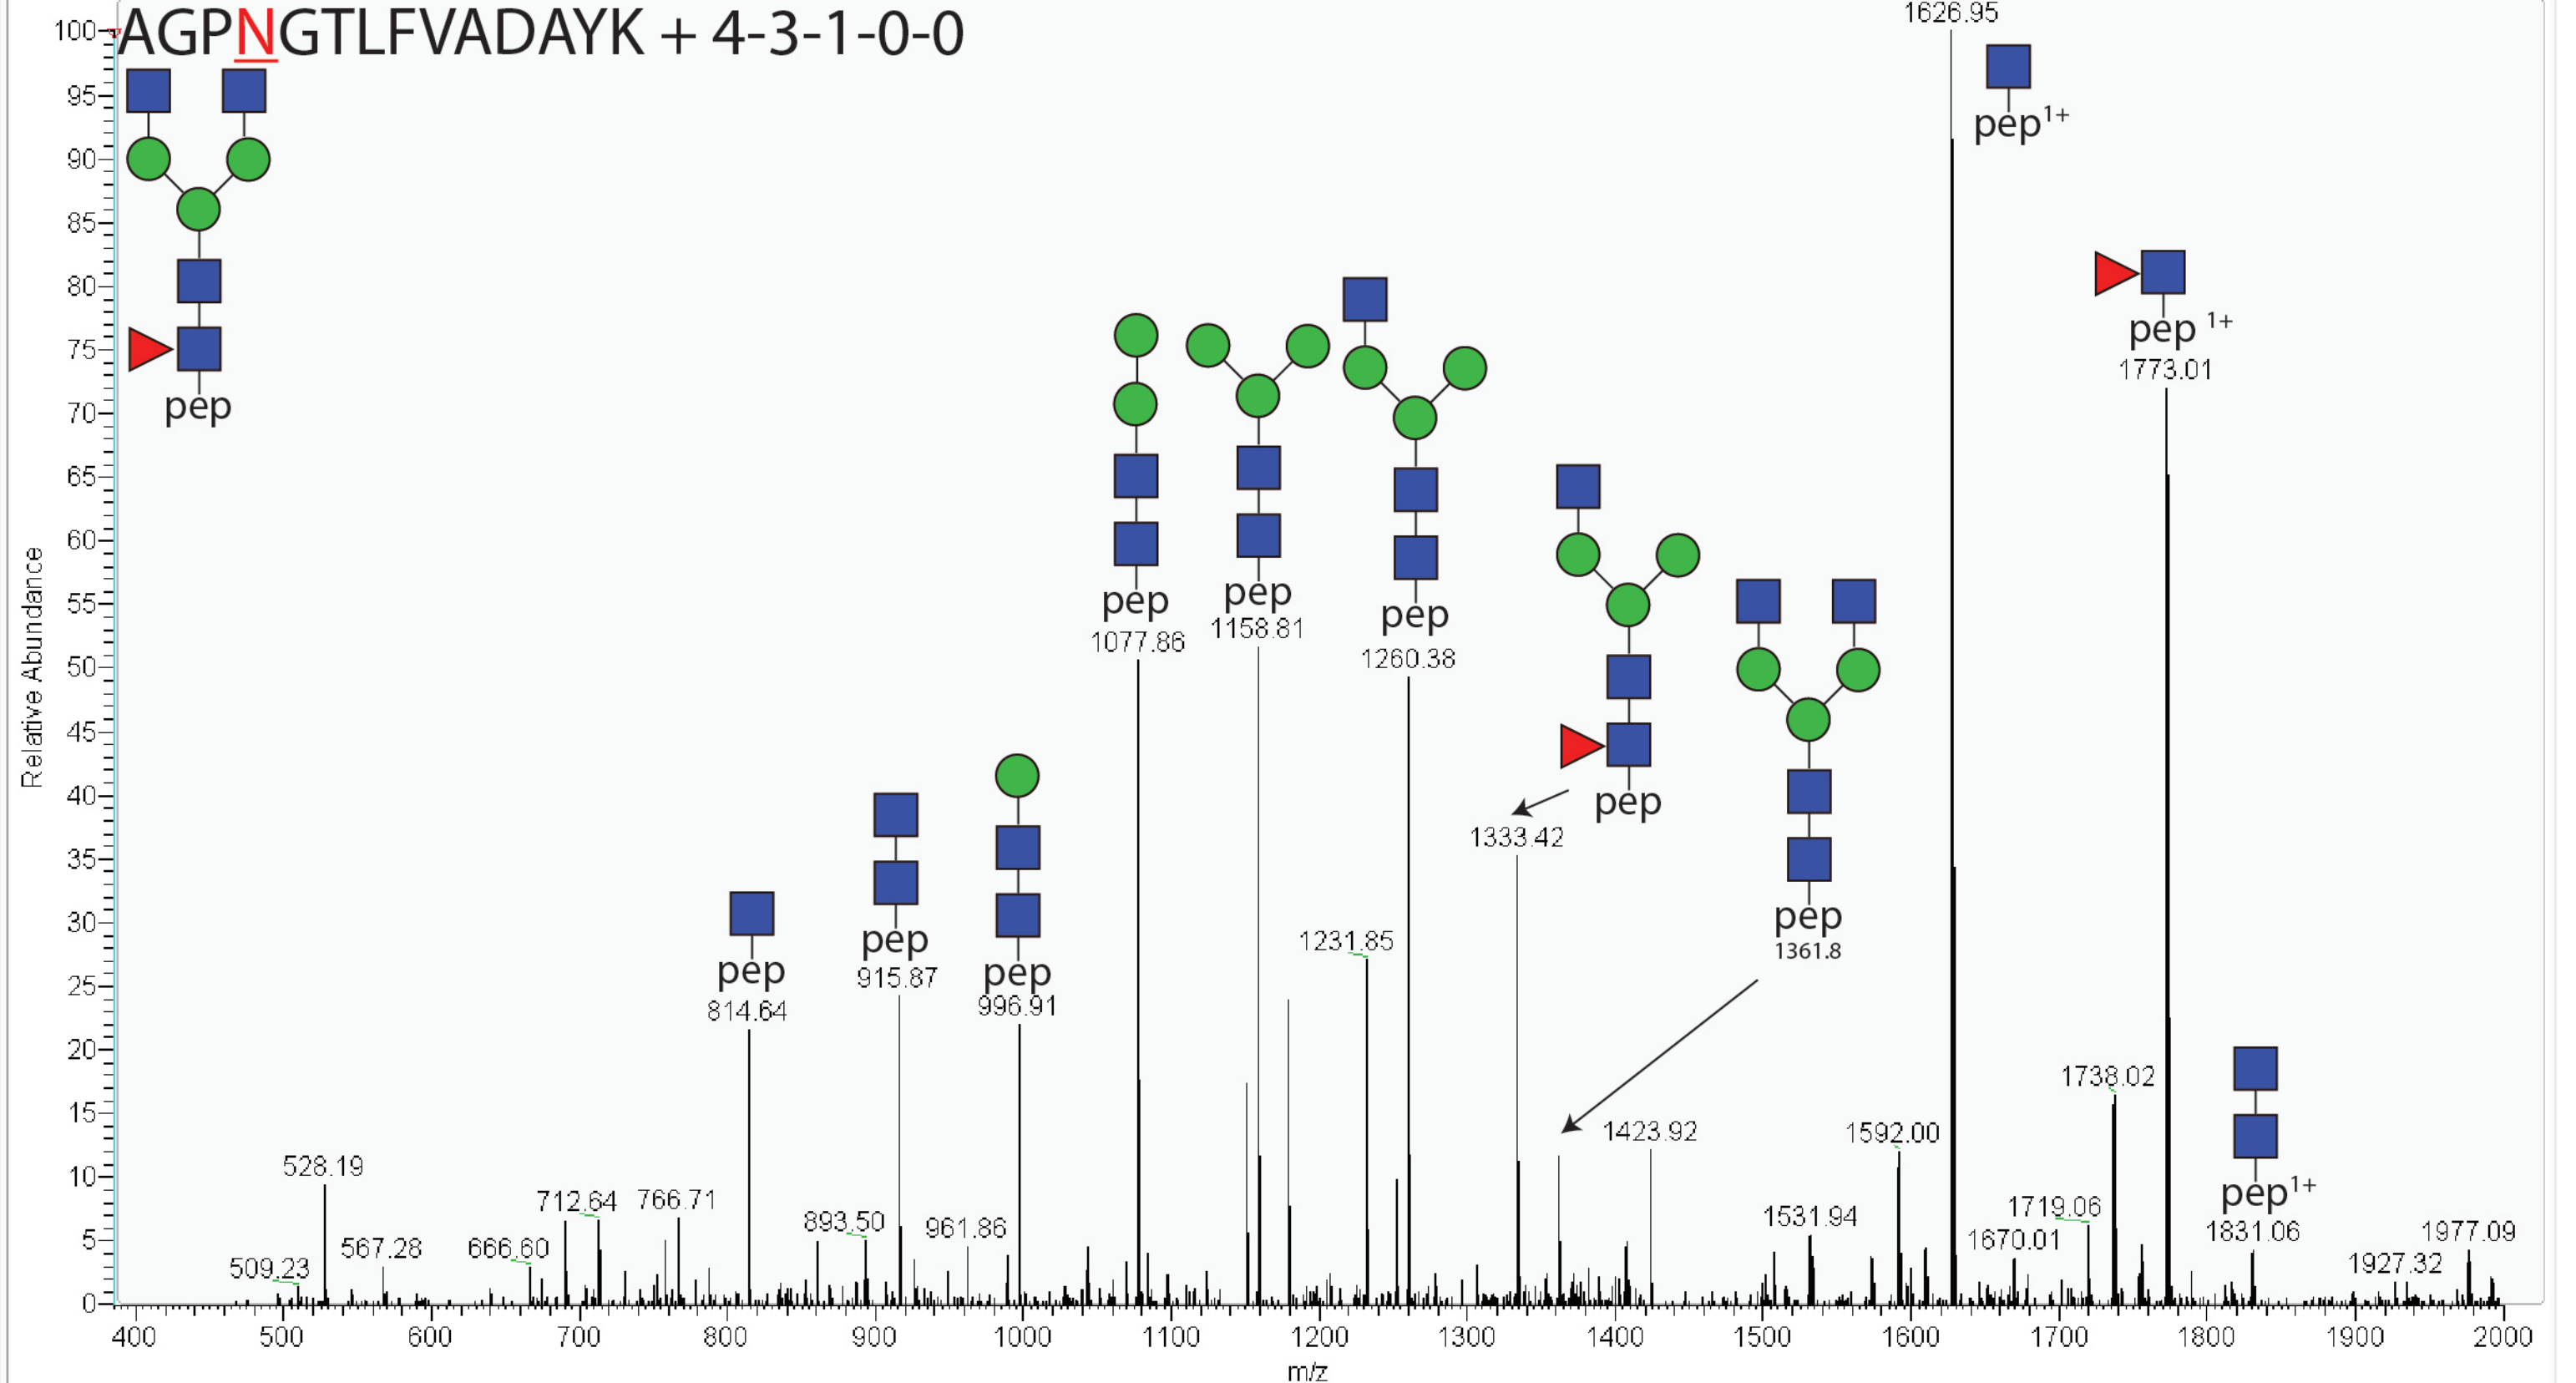

361\_HILIC\_091614\_02\_1#1827 RT: 23.91 AV: 1 NL: 6.27E3  
T: ITMS + c NSI d Full ms2 1538.12@cid35.00 [410.00-2000.00]

Parent  $m/z$  1538.124

**ENG**TDTVQEEEESPAEGSK+2-3-1-0-0

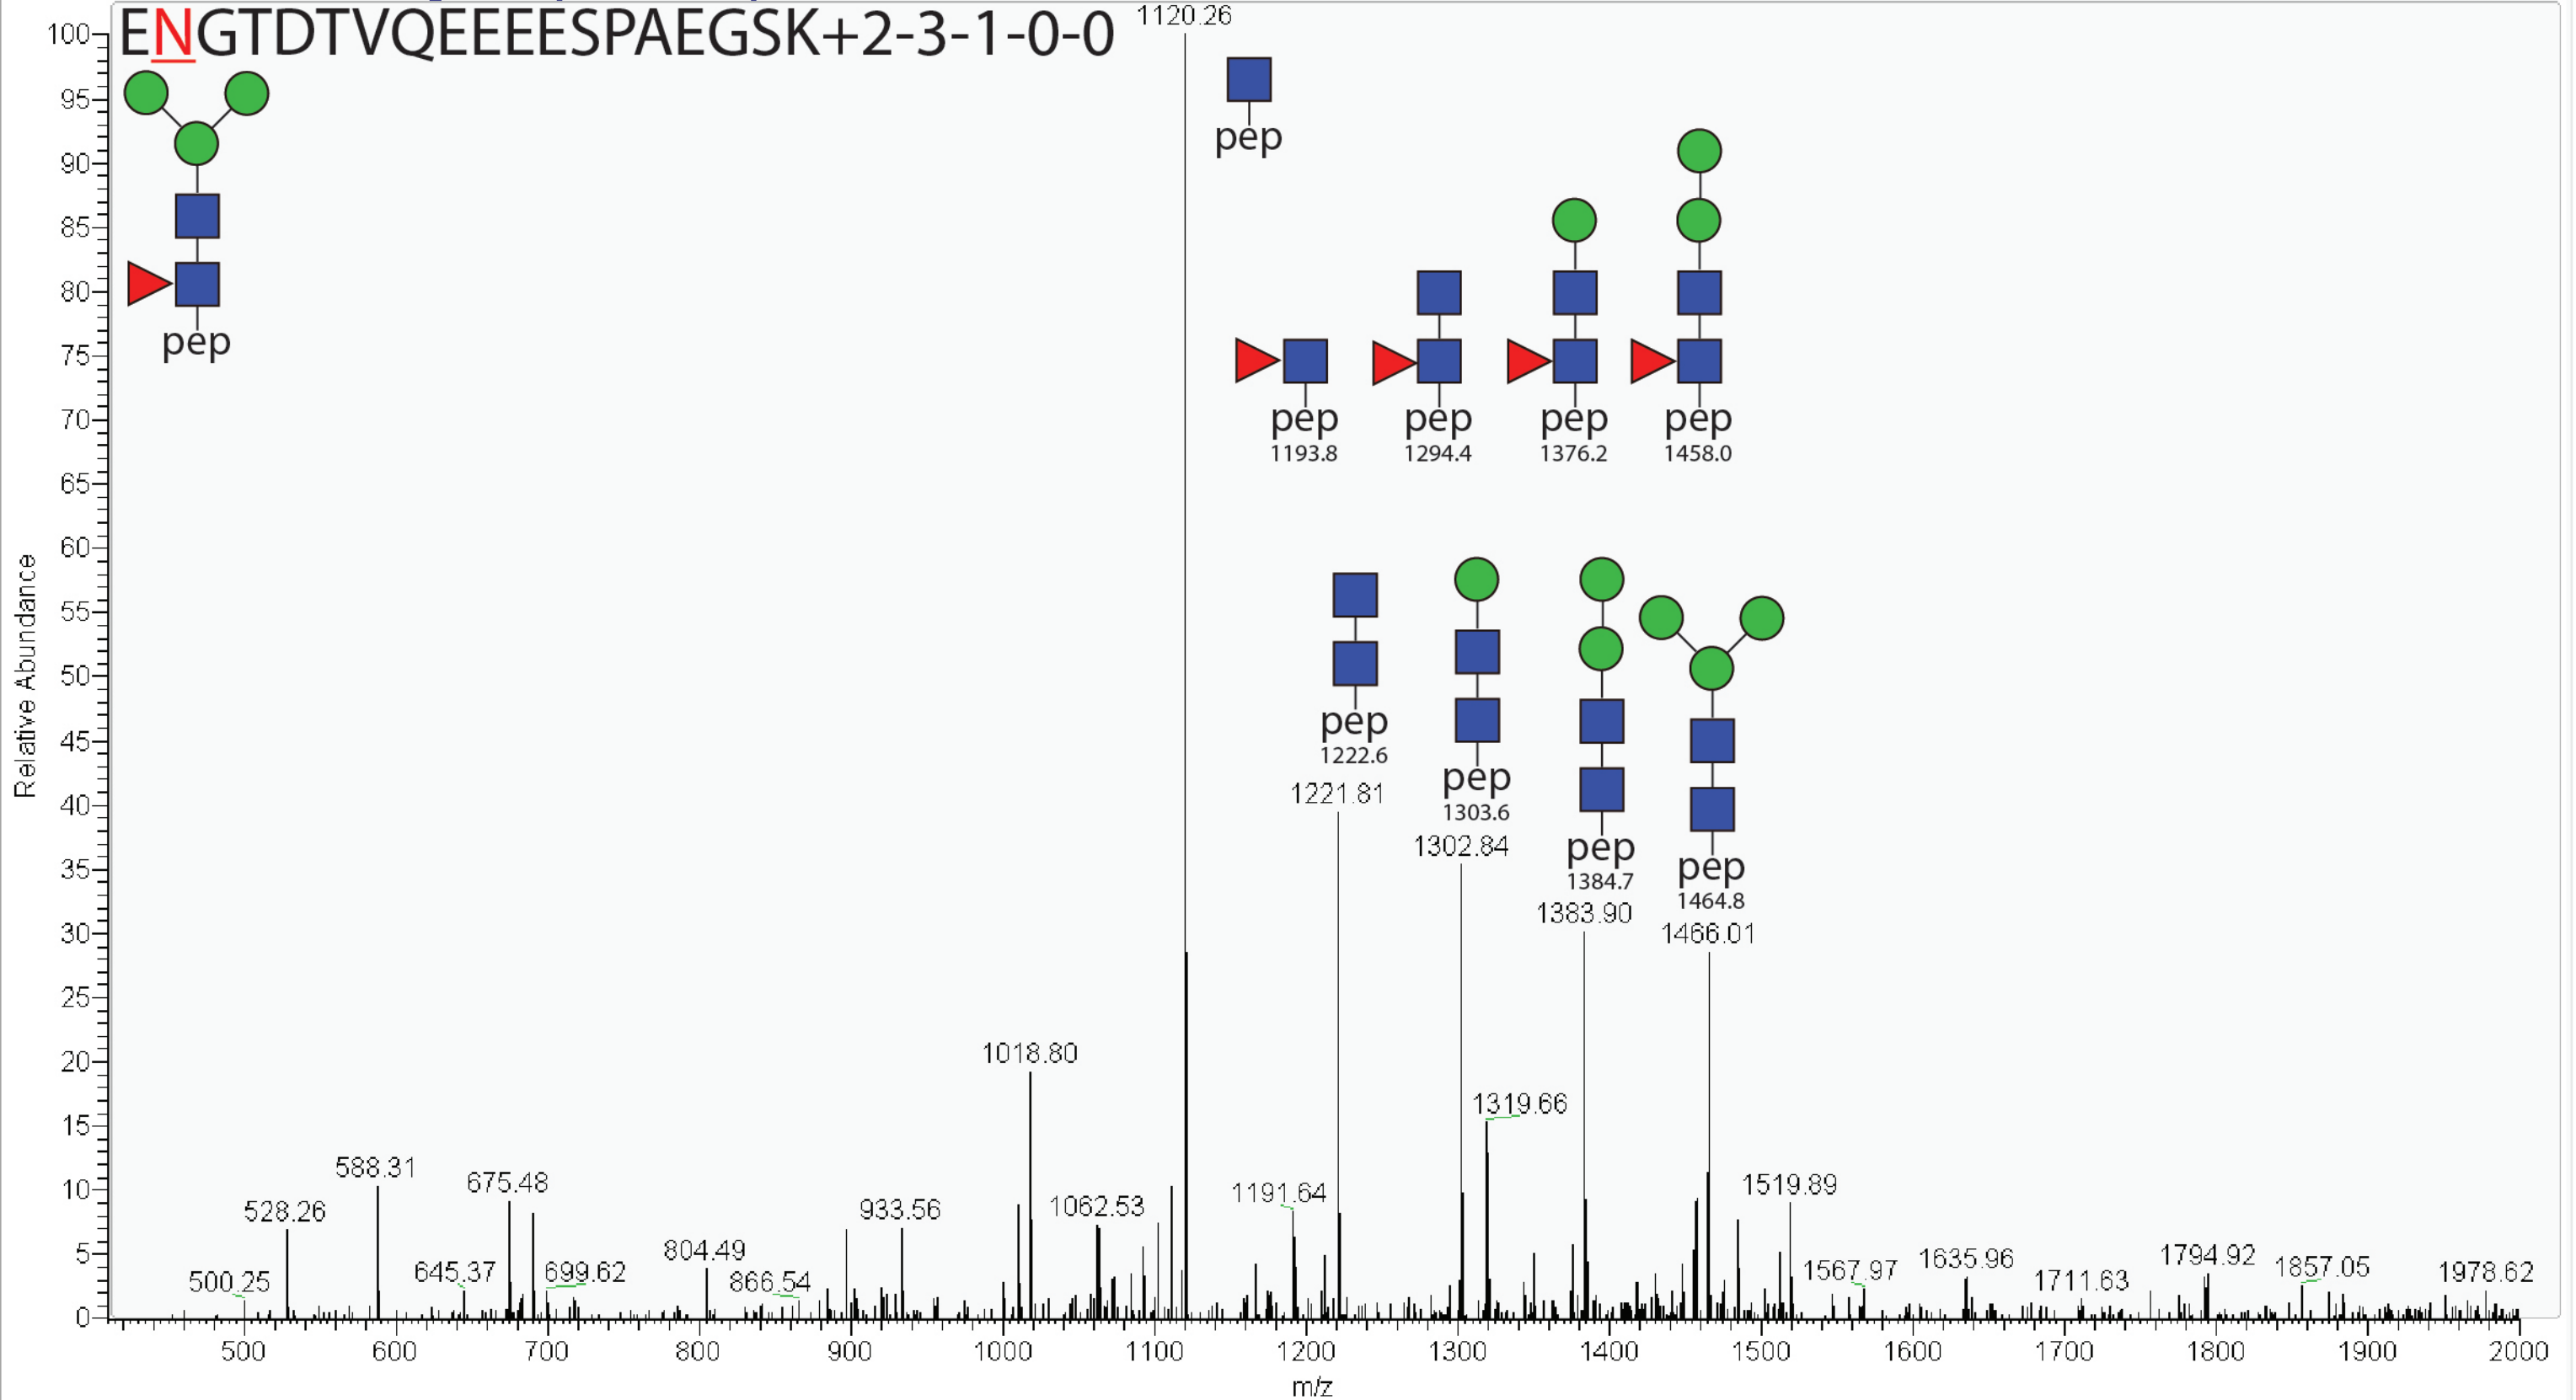

361\_HILIC\_091614\_02\_1 #2108 RT: 25.59 AV: 1 NL: 1.16E4  
T: ITMS + c NSI d Full ms2 1326.58@cid35.00 [355.00-2000.00]

Parent  $m/z$  1326.579

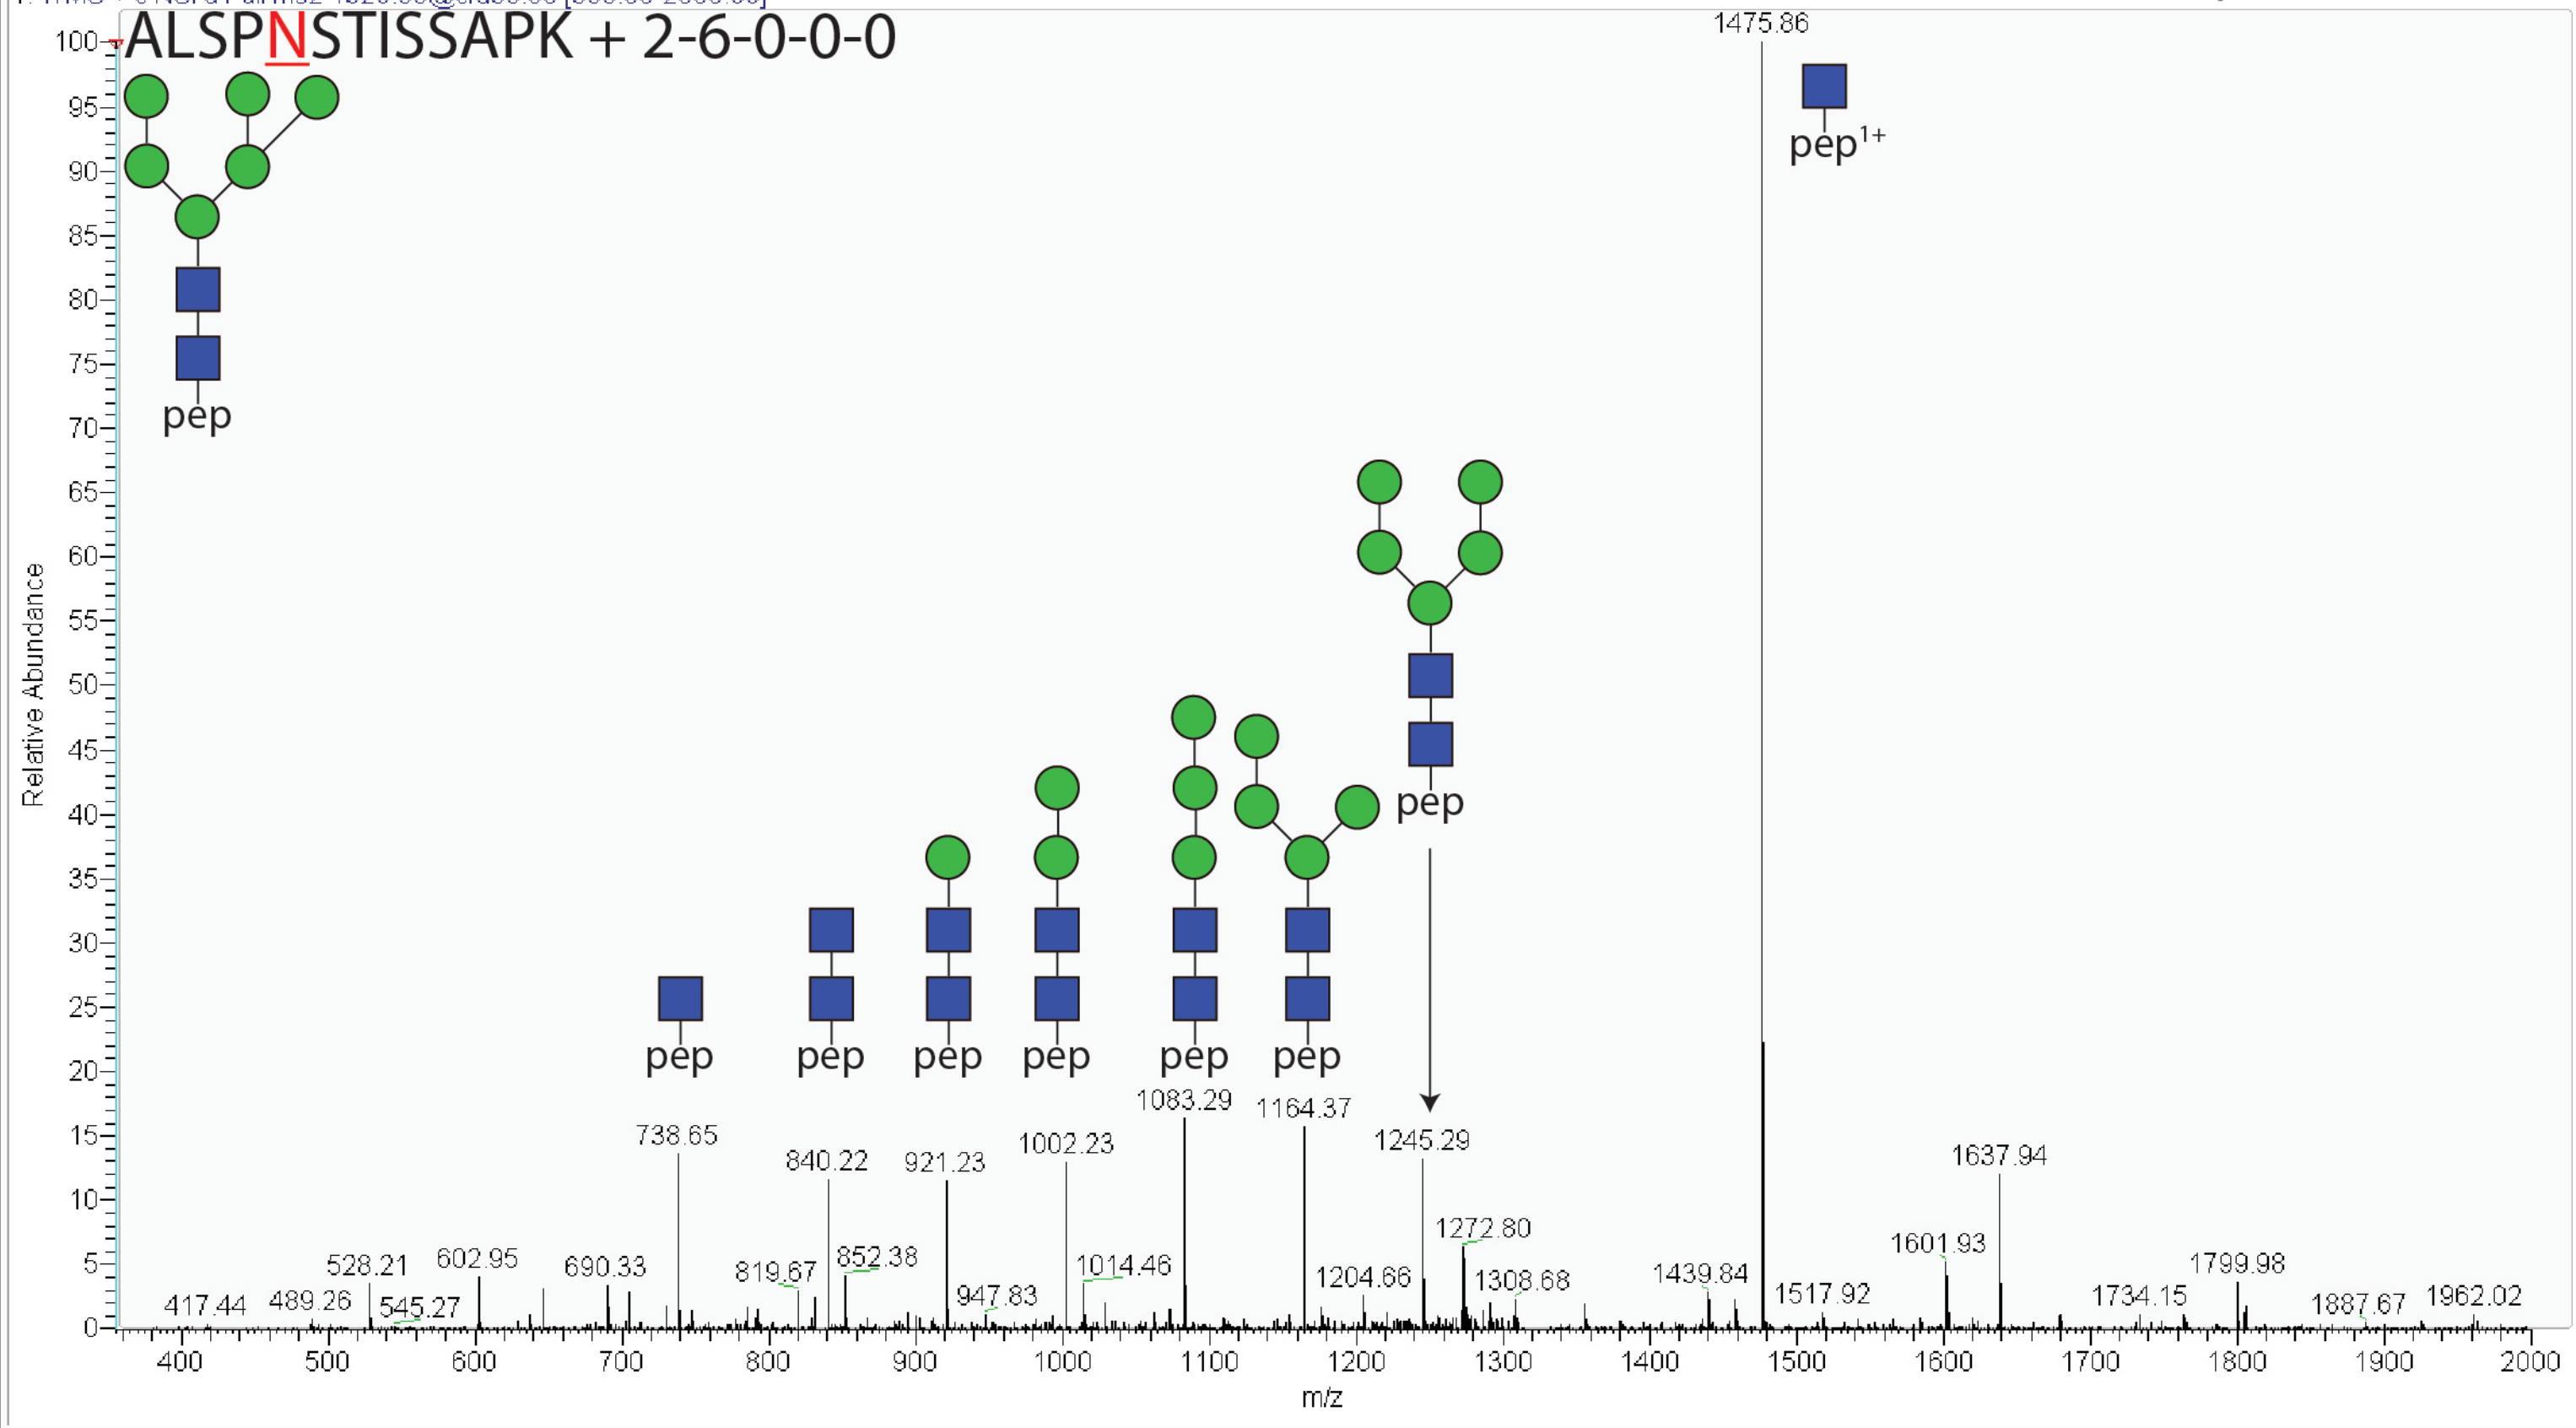



AAIPSAALDTNSSK + 4-5-1-1-0

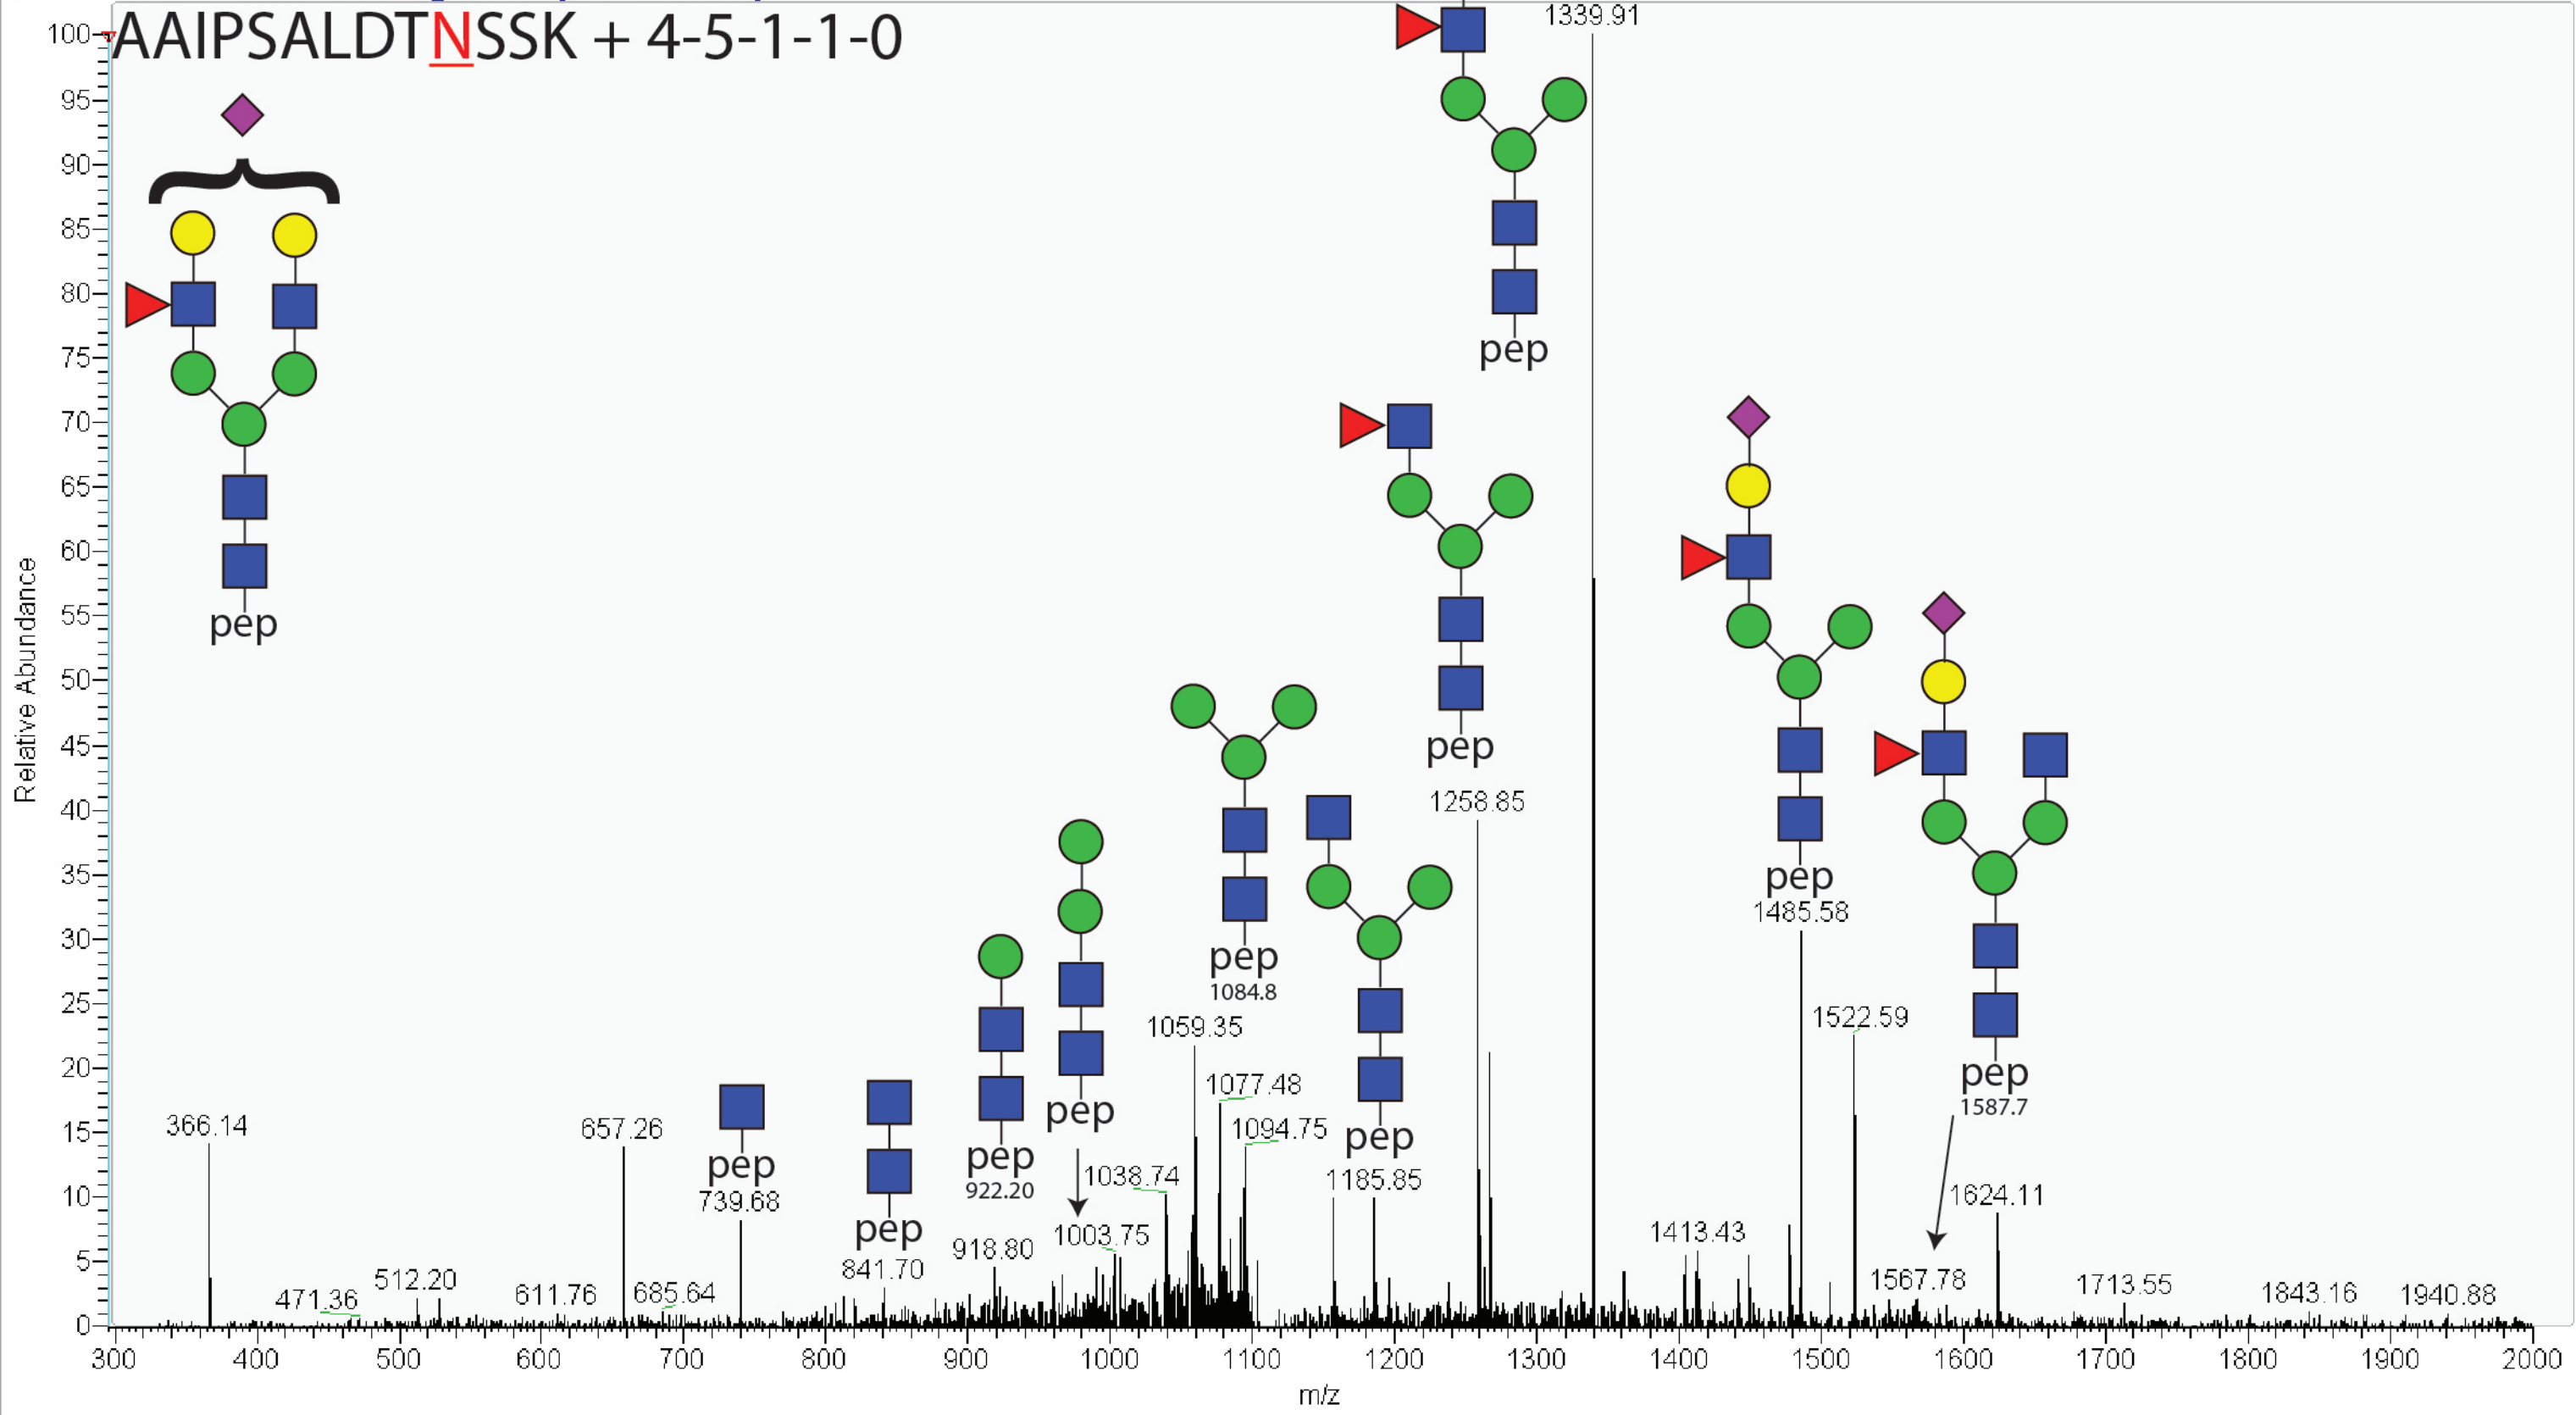

# AAIPSALDTNSSK + 3-4-1-1-0

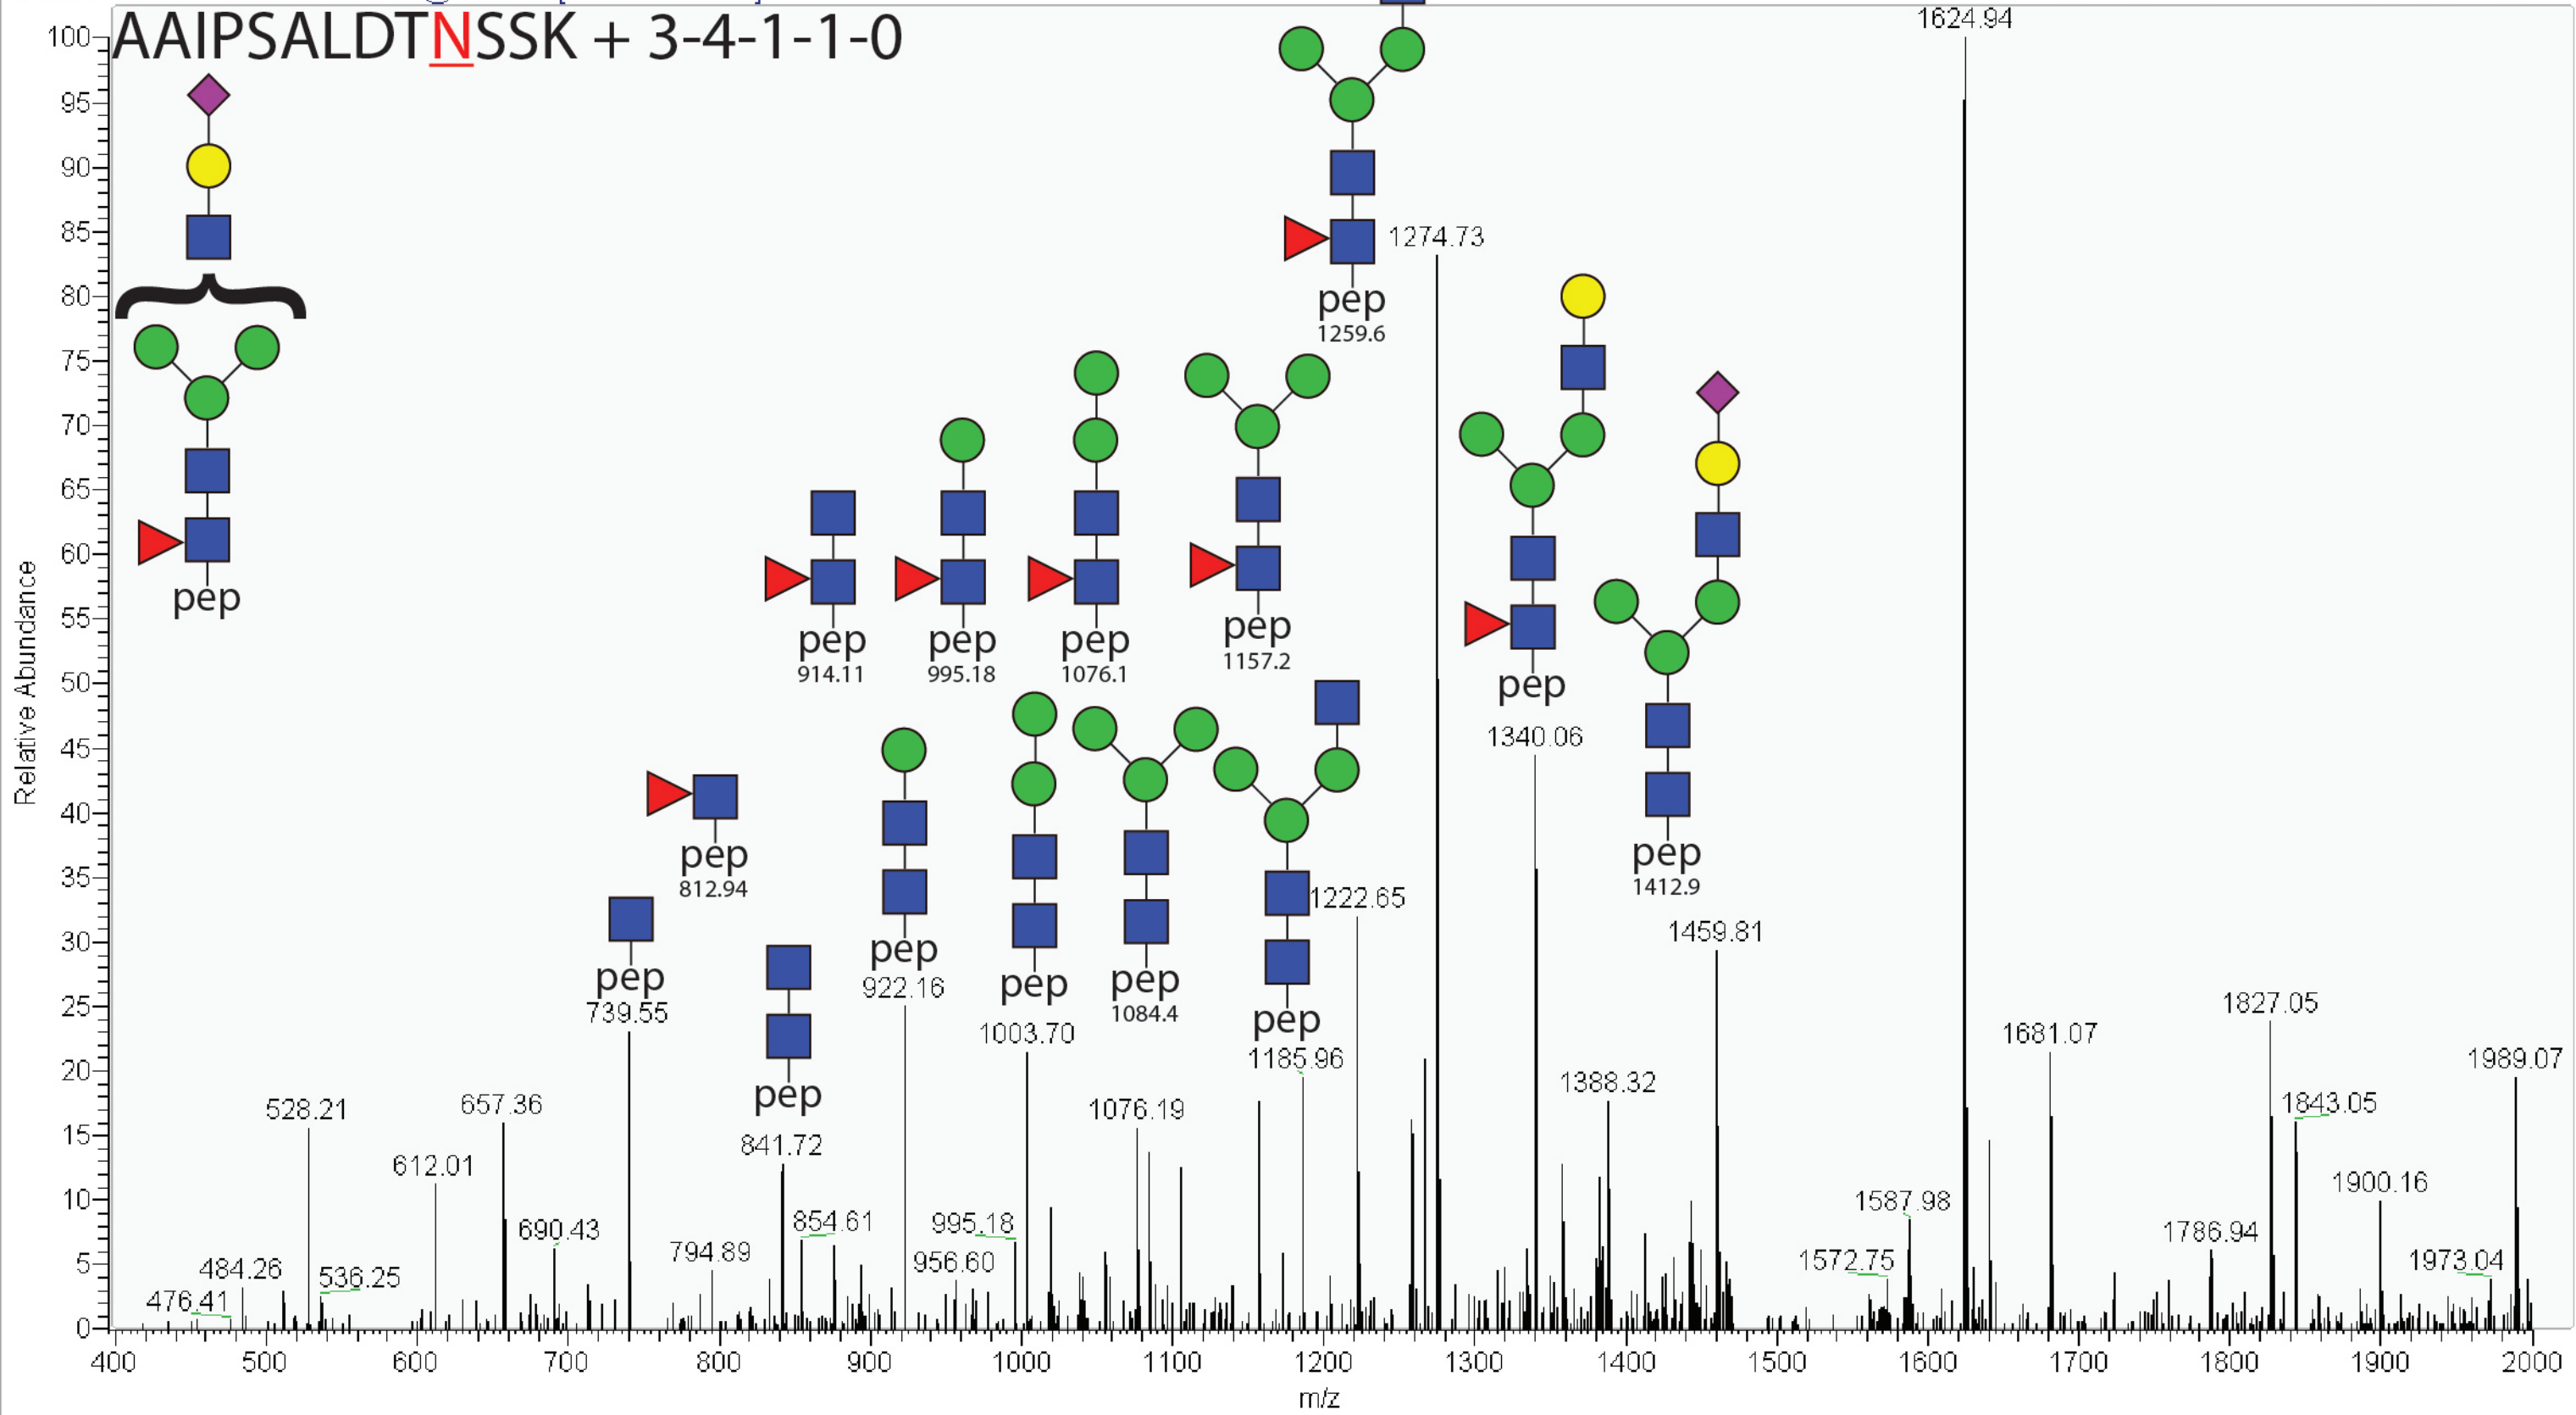

**G**NETIVNLIHSTR + 3-6-0-1-0

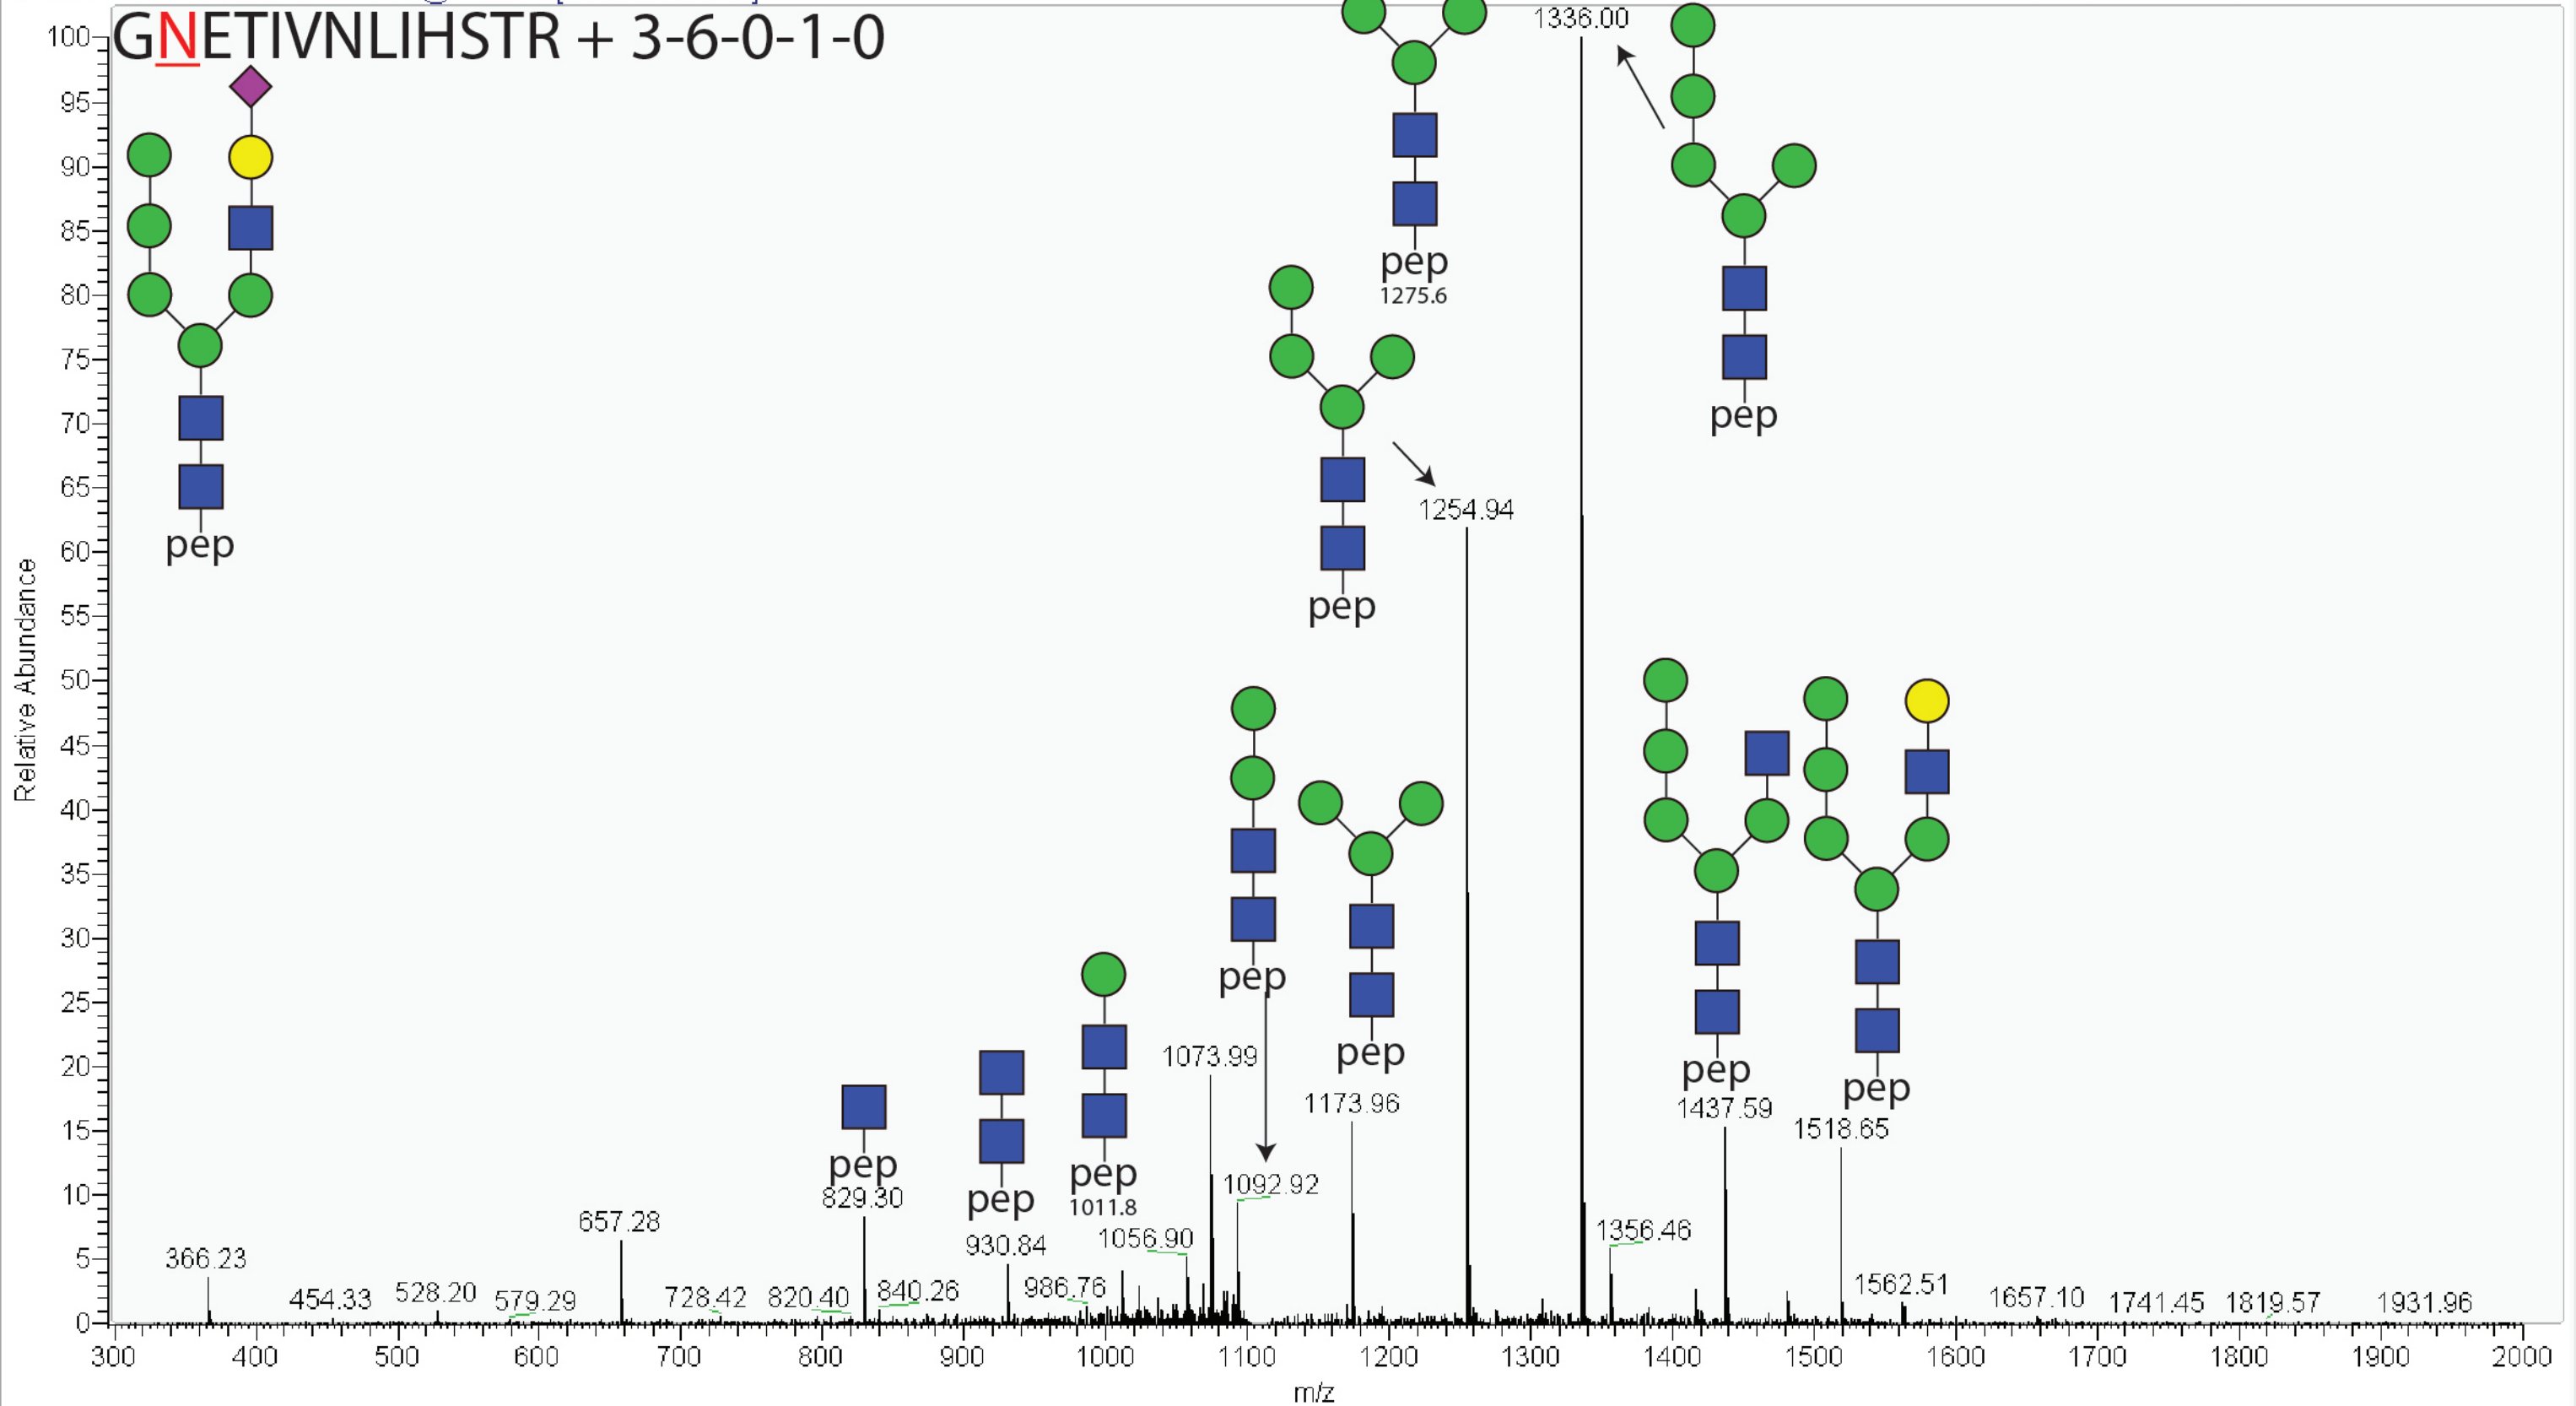

Supplement: NIHMS782613-supplement-Supplemental_Data.pdf [file NIHMS782613-supplement-Supplemental_Data.pdf]
